# Supplementary material for: Exploring biomarkers in routine diagnostics for the risk stratification of older patients in the Chest Pain Unit: a prospective cohort study
Source: PubMed Central journal article supplement — BMJ Open. 2022 Dec 26;12(12):e056674. doi: 10.1136/bmjopen-2021-056674 (PMC9806057; doi:10.1136/bmjopen-2021-056674), 2022-12-26
Supplement: bmjopen-2021-056674.draft_revisions.pdf [file bmjopen-2021-056674.draft_revisions.pdf]

# BMJ Open

BMJ Open is committed to open peer review. As part of this commitment we make the peer review history of every article we publish publicly available.

When an article is published we post the peer reviewers' comments and the authors' responses online. We also post the versions of the paper that were used during peer review. These are the versions that the peer review comments apply to.

The versions of the paper that follow are the versions that were submitted during the peer review process. They are not the versions of record or the final published versions. They should not be cited or distributed as the published version of this manuscript.

BMJ Open is an open access journal and the full, final, typeset and author-corrected version of record of the manuscript is available on our site with no access controls, subscription charges or pay-per-view fees (<http://bmjopen.bmj.com>).

If you have any questions on BMJ Open's open peer review process please email [info.bmjopen@bmj.com](mailto:info.bmjopen@bmj.com)

# BMJ Open

## Exploring biomarkers in routine diagnostics for the risk stratification of older patients in the chest pain unit: A prospective cohort study.

|                               |                                                                                                                                                                                                                                                                                                                                                                                                                                                                                                                                                                                                                                                                                                                    |
|-------------------------------|--------------------------------------------------------------------------------------------------------------------------------------------------------------------------------------------------------------------------------------------------------------------------------------------------------------------------------------------------------------------------------------------------------------------------------------------------------------------------------------------------------------------------------------------------------------------------------------------------------------------------------------------------------------------------------------------------------------------|
| Journal:                      | <i>BMJ Open</i>                                                                                                                                                                                                                                                                                                                                                                                                                                                                                                                                                                                                                                                                                                    |
| Manuscript ID                 | bmjopen-2021-056674                                                                                                                                                                                                                                                                                                                                                                                                                                                                                                                                                                                                                                                                                                |
| Article Type:                 | Original research                                                                                                                                                                                                                                                                                                                                                                                                                                                                                                                                                                                                                                                                                                  |
| Date Submitted by the Author: | 21-Aug-2021                                                                                                                                                                                                                                                                                                                                                                                                                                                                                                                                                                                                                                                                                                        |
| Complete List of Authors:     | Kunz, Anna Lisa ; University Hospital Heidelberg, Departement of Cardiology, Angiology and Pneumology<br>Schönstein, Anton; Heidelberg University, Network Aging Research<br>Bahrmann, Philipp; Friedrich-Alexander-Universitat Erlangen-Nurnberg, Giannitsis, Evangelos; University Hospital Heidelberg Medical Clinic, Department of Cardiology, Angiology and Pulmonology<br>Wahl, Hans-Werner; Heidelberg University, Network Aging Research and Institute of Psychology<br>Katus, Hugo; University of Heidelberg, Cardiology and Pneumology<br>Frey, Norbert; University Hospital Heidelberg Medical Clinic, Departement of Cardiology, Angiology and Pneumology<br>Bahrmann, Anke; University of Heidelberg, |
| Keywords:                     | GERIATRIC MEDICINE, CARDIOLOGY, Risk management < HEALTH SERVICES ADMINISTRATION & MANAGEMENT                                                                                                                                                                                                                                                                                                                                                                                                                                                                                                                                                                                                                      |
|                               |                                                                                                                                                                                                                                                                                                                                                                                                                                                                                                                                                                                                                                                                                                                    |

SCHOLARONE™  
Manuscripts

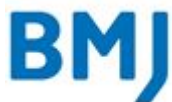

I, the Submitting Author has the right to grant and does grant on behalf of all authors of the Work (as defined in the below author licence), an exclusive licence and/or a non-exclusive licence for contributions from authors who are: i) UK Crown employees; ii) where BMJ has agreed a CC-BY licence shall apply, and/or iii) in accordance with the terms applicable for US Federal Government officers or employees acting as part of their official duties; on a worldwide, perpetual, irrevocable, royalty-free basis to BMJ Publishing Group Ltd ("BMJ") its licensees and where the relevant Journal is co-owned by BMJ to the co-owners of the Journal, to publish the Work in this journal and any other BMJ products and to exploit all rights, as set out in our [licence](#).

The Submitting Author accepts and understands that any supply made under these terms is made by BMJ to the Submitting Author unless you are acting as an employee on behalf of your employer or a postgraduate student of an affiliated institution which is paying any applicable article publishing charge ("APC") for Open Access articles. Where the Submitting Author wishes to make the Work available on an Open Access basis (and intends to pay the relevant APC), the terms of reuse of such Open Access shall be governed by a Creative Commons licence – details of these licences and which [Creative Commons](#) licence will apply to this Work are set out in our licence referred to above.

Other than as permitted in any relevant BMJ Author's Self Archiving Policies, I confirm this Work has not been accepted for publication elsewhere, is not being considered for publication elsewhere and does not duplicate material already published. I confirm all authors consent to publication of this Work and authorise the granting of this licence.

1

2  
3  
4 **Exploring biomarkers in routine diagnostics for the risk stratification of older patients in the chest pain**  
5 **unit: A prospective cohort study.**  
6  
7  
8  
9

10 Anna Lisa Kunz<sup>1</sup>, Anton Schönstein<sup>2</sup>, Philipp Bahrmann<sup>3</sup>, Evangelos Giannitsis<sup>1</sup>, Hans-Werner Wahl<sup>2,4</sup>, Hugo  
11  
12 A. Katus<sup>1</sup>, Norbert Frey<sup>1</sup> & Anke Bahrmann<sup>1,2</sup>  
13  
14  
15  
16

17  
18 <sup>1</sup>Department of Cardiology, Angiology and Pneumology, University Hospital of Heidelberg, Germany  
19

20 <sup>2</sup>Network Aging Research (NAR), Heidelberg University, Heidelberg, Germany  
21

22  
23 <sup>3</sup>Institute for Biomedicine of Aging, Friedrich-Alexander-University, Nuremberg, Germany  
24

25  
26 <sup>4</sup>Institute of Psychology, Heidelberg University  
27  
28  
29  
30

31  
32 **Author information:**  
33

34 Anna Lisa Kunz, Department of Cardiology, Angiology and Pneumology, Heidelberg University Hospital,  
35  
36 Heidelberg, Germany.  
37

38  
39 Anton Schönstein, MSc, Network Aging Research, Heidelberg University, Heidelberg, Germany.  
40

41  
42 Philipp Bahrmann, MD, MHBA, Institute for Biomedicine of Aging, Friedrich-Alexander-University, Erlangen-  
43  
44 Nuremberg, Germany.  
45

46  
47 Evangelos Giannitsis, MD, Department of Cardiology, Angiology and Pneumology, Heidelberg University  
48  
49 Hospital, Heidelberg, Germany.  
50

51  
52 Hans-Werner Wahl, PhD, Network Aging Research & Institute of Psychology, Heidelberg University,  
53  
54 Heidelberg, Germany.  
55

56  
57 Hugo A. Katus, MD, Department of Cardiology, Angiology and Pneumology, Heidelberg University Hospital,  
58  
59 Heidelberg, Germany.  
60

2

1  
2  
3  
4 Norbert Frey, MD, Department of Cardiology, Angiology and Pneumology, Heidelberg University Hospital,  
5  
6 Heidelberg, Germany.  
7

8  
9 Anke Bahrmann, MD, Department of Cardiology, Angiology and Pneumology, Heidelberg University Hospital  
10  
11 & Network Aging Research, University of Heidelberg, Heidelberg, Germany.  
12  
13  
14  
15

16 **Corresponding author:**  
17

18  
19 (1) Anke Bahrmann, Department of Cardiology, Angiology and Pneumology, Heidelberg University  
20  
21 Hospital, Im Neuenheimer Feld 410, 69120 Heidelberg, Germany.  
22

23 E-Mail: [anke.bahrmann@med.uni-heidelberg.de](mailto:anke.bahrmann@med.uni-heidelberg.de)  
24

25 Phone: +49/(0)6221-568676  
26  
27  
28  
29  
30  
31  
32  
33  
34  
35  
36  
37  
38  
39  
40  
41  
42  
43  
44  
45  
46  
47  
48  
49  
50  
51  
52  
53  
54  
55  
56  
57  
58  
59  
60

3

**Abstract:**

**Objectives:** This study aims to estimate the association of the routinely applied biological age-related biomarkers hs-TnT, CRP and Hemoglobin (Hb) with all-cause mortality for the purpose of older patient's risk stratification in the emergency department (ED).

**Design:** Exploratory, prospective cohort study with a follow-up at 2.5 years after recruitment start. For the predictors, data from the hospital files including the routinely applied biological age-related biomarkers hs-TnT, CRP and Hemoglobin (Hb) were supplemented by a questionnaire.

**Setting:** A cardiological ED, chest pain unit, of the university hospital in Heidelberg, Germany.

**Participants:** N=256 cardiological ED patients with a minimum age of 70 years and with an expected life-expectancy above 24h.

**Primary outcome measures:** The primary outcome of this study was all-cause mortality which was assessed by requesting registry office information.

**Results:** Among N=256 patients 63 died over the follow-up period. Positive results in each of the three biomarkers alone as well as the combination were associated with increased all-cause mortality at follow-up. The number of positive age-related biomarkers appeared to be strongly indicative of the risk of mortality, even when controlled for major confounders (age, sex, BMI, creatinine clearance, and comorbidity).

**Conclusions:** In older ED patients, biomarkers explicitly related to biological aging processes such as hs-TnT, CRP and Hb were independently of each other as well as combined associated with an increased risk of all-cause mortality. Thus, they may have the potential to be used to supplement the general risk stratification of older patients in the ED. Validation of the results in a large dataset is needed.

**Key words:** troponin, CRP, hemoglobin, mortality, routine diagnostics.

**Strengths and limitations of this study:**

- The prospective design and the 2.5 years long follow-up period with few censored observations at early times are strengths of this study.

4

- As information about medical history and diagnoses received from the visit to the ED were available, effect estimates could be controlled for major confounders.
- Limitations of this study are mainly the exploratory approach, the single-center design, and the relatively small number of events.

**Declarations:**

**Funding Statement:** This research received no specific grant from any funding agency in the public, commercial or not-for-profit sectors. A.S. is a member of the interdisciplinary Graduate Program “People with Dementia in General Hospitals”, located at the Network Aging Research (NAR), Heidelberg University, Germany, and received a Doctoral Fellowship funded by the Robert Bosch Foundation, Stuttgart, Germany.

**Competing interest statement:****Anna Lisa Kunz**

No funds, grants, or other support to report.

**Anton Schönstein, MSc**

A. Schönstein has received research grants from the Robert Bosch Foundation.

**Philipp Bahrmann, MD, MHBA**

P. Bahrmann has received no funds, grants, or other support for this manuscript.

**Evangelos Giannitsis, MD**

E. Giannitsis has received research grants and honoraria from Roche Diagnostics, Bayer, and Mitsubishi Chemicals.

**Hans-Werner Wahl, PhD**

No funds, grants, or other support to report.

**Hugo A. Katus, MD**

H.A. Katus has received honoraria from AstraZeneca, Daiichi Sankyo, Boehringer Ingelheim, Berlin-Chemie, Bayer Vital and Novo Nordisk. He developed the cTnT assay, but the Troponin patent has expired.

5

**Norbert Frey, MD**

N. Frey has received no funds, grants, or other support to report.

**Anke Bahrmann, MD**

A. Bahrmann has received research support for her other project the Trade Study (Transport and Delirium in Elderly Study) from the Innovation Committee by the Joint Federal Committee (G-BA), but not for this study. A. Bahrmann has received speaking engagements from Bayer, Pfizer, Lilly, Novartis, Boehringer Ingelheim, Daiichi Sankyo, Novo Nordisk and Sanofi Aventis.

**Availability of data and material:** Data are available on reasonable request.

**Code availability:** The code for the analyses conducted in this study can be made available on request.

**Author contributions:****Study concept and design:**

Kunz, A. L., Schönstein, A. Wahl, H.-W., Giannitsis, E., Katus, H. A., Bahrmann, A.

**Acquisition of data:**

Schönstein, A., Kunz, A. L.

**Analysis and interpretation of data:**

Schönstein A., Kunz, A. L., Bahrmann, P., Bahrmann, A.

**Drafting of the manuscript:**

Kunz, A. L., Schönstein, A., Bahrmann, P., Giannitsis, E., Wahl, H.-W., Katus, H. A., Frey, N., Bahrmann, A.

**Critical revision of the manuscript for important intellectual content:**

Kunz, A. L., Schönstein, A., Bahrmann, P., Giannitsis, E., Wahl, H.-W., Katus, H. A., Frey, N., Bahrmann, A.

**Ethics approval:**

The research reported in this paper was conducted in accordance with the ethical standards as laid down in the 1964 Declaration of Helsinki and the protocol was approved by the ethics committee of the medical faculty at the University of Heidelberg (S-455/2016).



6

**Consent to participate:** Informed consent was obtained for all individual participants included in the study.

**Acknowledgements:** We thank the patients who participated in this study.

**Word count (abstract): 255**

**Word count (main text): 3248**

**Tables: 3**

**Figures: 1**

For peer review only

## 1 **Introduction**

2 Older adults are an increasing population and frequent users of the emergency department (ED) setting  
3 [1]. As a challenging clientele they frequently present with atypical symptoms, poly medication, and unclear  
4 medical history in the ED [2] and physicians then face the challenge of quickly identifying those patients with a  
5 high-risk of adverse outcomes. Strategies to combine biomarkers indicative of biological age (see Wagner et al.  
6 [3]) may enhance risk stratification of older and geriatric patients in the ED, due to their objectivity and clear  
7 clinical implications. From a biomarkers of aging framework three distinct biomarkers (C-reactive protein, high-  
8 sensitive troponin-T, and hemoglobin) are frequently encountered in routine diagnostic procedures.

9 Established theories of immune-senescence and „*inflammaging*“ describe biological aging as a chronic,  
10 low-grade inflammatory status [4]. In accordance with this, markers such as C-reactive protein (CRP) have shown  
11 their potential for the prognosis of older people in terms of frailty and mortality [5] as well as in terms of events  
12 such as myocardial infarction or stroke [6].

13 Similarly, high-sensitivity troponins can serve as biomarkers of age. Troponins are regulator proteins of  
14 the contractile apparatus and enter the bloodstream in case of cardiomyocyte damage. The high-sensitivity  
15 troponins (hs-TnT) showed a notable predictive validity regarding mortality as well as other outcomes such as  
16 myocardial infarction or stroke in numerous studies [7–11]. It was also found that these effects of elevated  
17 troponins are independent of their etiology [7]. They thus mark a general risk factor that must be urgently noticed  
18 before any further treatment.

19 Further, geriatric patients frequently have decreased levels of hemoglobin in form of anemia [12].  
20 Recently, a study by Han et al. found that in apparently healthy older people the occurrence of anemia is associated  
21 with an increased rate of hospitalization and mortality [13], irrespective of the underlying comorbidities [14].

22 In this study we therefore aim to estimate the association of the biomarkers C-reactive protein, high-  
23 sensitive troponin-T, and hemoglobin, with older ED patient’s all-cause mortality. Accordingly, we expect an  
24 increased all-cause mortality with elevated cardiac or inflammation markers or low hemoglobin levels, even when  
25 age, overall comorbidity and other variables (sex, BMI, renal functioning) are controlled for. Given the differential  
26 mechanisms in the pathways of these biomarkers, we also hypothesize that the risk of mortality will increase even  
27 further when these different markers interact, and a patient therefore shows more than one abnormal result.

## 28 **Methods**

### 29 Study design, setting, and participants

30 The study's design was a single-center prospective cohort study. It was conducted in the chest pain unit  
31 (CPU) with 12 beds as part of the cardiological ED of a university hospital (114 beds in the cardiological  
32 department overall). In total, 260 cardiological ED patients with a minimum age of 70 years were recruited  
33 (participation rate  $\approx$  76%). The first patient was recruited in July 2017 and the last one in May 2018. Patients were  
34 excluded in cases of missing informed consent or an expected life expectancy of less than 24h. Further, patients  
35 that were isolated due to transmission-based precautions had to be excluded from the study.

36 Baseline information was assessed by using a questionnaire, in which the Short Portable Mental  
37 Questionnaire (SPMSQ) [15] was integrated, and additionally by extracting relevant data from the hospital files.  
38 Follow-up data for this study was collected by requesting registry office information on mortality roughly 2.5  
39 years after recruitment of the first patient.

40 Based on the cognitive performance on the Short Portable Mental Status Questionnaire [15], about 23%  
41 of the participants had at least a minor form of cognitive impairment. Participants presented to the cardiological  
42 ED with numerous symptoms, including dyspnea (59%), thorax pain (20%), and angina pectoris (18%), vertigo  
43 (9%) and palpitations (8%). Frequent primary diagnoses were suspicion/exclusion of myocardial infarction (26%),  
44 cardiac decompensation (23%), and heart rhythm disturbances (19%). Further information on primary and  
45 secondary diagnoses of the sample are presented in detail in Supplementary Tables 1 and 2.

46 This research was conducted in accordance with the ethical standards as laid down in the 1964  
47 Declaration of Helsinki. The protocol was approved by the ethics committee of the medical faculty at the  
48 University of Heidelberg (S-455/2016).

### 49 Patient and public involvement

50 No patient involved.

### 51 Study variables

52 The biomarkers relevant to this study were part of the routinely applied diagnostic procedures in the ED.  
53 To classify the lab results as positive or negative, the following cut offs were used.

1  
2  
3  
4 54 For CRP a cut-off > 5 mg/l was used. This cut off is an established reference value [16, 17] and was used  
5  
6 55 for both sexes, as studies showed a similar distribution of this marker among men and women [18].  
7

8  
9 56 A value of hs-TnT > 14 ng/L (i.e. exceeding the 99<sup>th</sup> percentile of a multicenter reference study) [19]  
10  
11 57 describes the cut-off for both sexes. Increased levels showed a higher risk for cardiovascular events [19] and the  
12  
13 58 prognostic value of including gender difference for hs-TnT was detected only modest in other studies [20].  
14

15 59 Due to the fact that mild anemia was defined as a hemoglobin (Hb) concentration between 10,0 g/dl and  
16  
17 60 11,9 g/dl in women and between 10,0 g/dl and 12,9 g/dl in men [21], we used a cut-off of < 12 g/dl for women  
18  
19 61 and < 13 g/dl for men. This identifies anemia as defined by the World Health Organization [22].  
20  
21

22 62 To assess the effect of multiple biomarkers of interest being positive in a given patient, a combined  
23  
24 63 predictor variable ranging from 0-3 was created, with zero indicating a positive result in none of the biomarkers,  
25  
26 64 1 indicating a positive result in either one of them, et cetera. This strategy of combining the predictors was chosen  
27  
28 65 as the sample size is relatively small and the pathways of the biomarker effects are assumed to be different. Also,  
29  
30 66 the resulting groups were fairly balanced.  
31

32 67 Overall comorbidity and age of the patients as a central control variable was accounted for using the  
33  
34 68 Charlson-Age Comorbidity Index (CACI) [23] based on the patient's medical history which included the  
35  
36 69 diagnoses assigned by the ED physician. Higher values indicate more severe comorbidity.  
37  
38

39 70 In order to more precisely account for patient's renal functioning as possible confounder, an estimate of  
40  
41 71 the creatinine clearance based on the formula by Cockcroft & Gault [24] was calculated based on serum creatinine.  
42  
43

44 72 For the purpose of sample description, participants' result (error score) on the cognitive screening  
45  
46 73 SPMSQ is also reported. The theoretical range of the SPMSQ is 0-10 and higher values indicate worse cognitive  
47  
48 74 performance.  
49

50 75 The primary outcome examined in this study was the patient's all-cause mortality (time-to-event, days)  
51  
52 76 after their initial ED visit. This information was collected using registry office information.  
53  
54

55 77 Statistical methods  
56  
57  
58  
59  
60

10

1  
2  
3  
4 78 To describe the characteristics of the sample, means, standard deviations, medians and interquartile  
5  
6 79 ranges were calculated for continuous or discrete variables. Absolute and relative frequencies were calculated for  
7  
8 80 categorical variables.  
9

10  
11 81 Kaplan-Meier curves were used to illustrate the associated effect of positive hs-TnT, CRP, anemia (Hb),  
12  
13 82 as well as the composite predictor of all three on overall survival after the initial ED visit. Cox proportional hazards  
14  
15 83 models were then used to first, get uncontrolled hazard ratio estimates for those effects and second, to control  
16  
17 84 those effects for patient's body-mass index, age, creatinine clearance, sex and overall comorbidity. Schoenfeld  
18  
19 85 residuals did not show evidence against the proportional hazards assumption.  
20

21 86 Missing values were rare (max.1.5% or 4/260 per variable) and were therefore handled by listwise  
22  
23 87 deletion, which reduced the total sample to  $N=256$  patients.  
24  
25

26 88 Uncertainty was quantified using 95% confidence intervals and as this study is of exploratory nature,  
27  
28 89 provided p-values are to be interpreted as descriptive.  
29

30  
31 90 All analyses were conducted using R version 3.6.1 (R Core Team, Vienna, Austria).  
32

## 33 91 **Results**

34  
35  
36 92 About 343 patients were eligible, 260 were recruited (participation rate  $\approx 76\%$ ); 4 patients had missing  
37  
38 93 data for major baseline variables due to them leaving the ED against medical advice.  
39

40  
41 94 In total, the final cohort of  $N=256$  participants can be described as a high age but, as measures of  
42  
43 95 dispersion for example for variables such as the number of medications indicate, heterogenous sample (detailed  
44  
45 96 descriptive characteristics in Table 1). Bivariate correlations show that there was only a weak association between  
46  
47 97 the results in each of the three biomarkers (hs-TnT with CRP:  $r_{\phi} = .30$ , 95%  $CI = .19-.41$ ; hs-TnT with Hb:  $r_{\phi} =$   
48  
49 98  $.35$ , 95%  $CI = .24-.45$ ; and CRP with Hb:  $r_{\phi} = .24$ , 95%  $CI = .13-.36$ , respectively).  
50  
51  
52  
53  
54  
55  
56  
57  
58  
59  
60

11

**Table 1***Descriptive statistics of the cohort (N=256).*

| Variable                      | n (%)     | Mean (SD)    | Median (IQR)         |
|-------------------------------|-----------|--------------|----------------------|
| Age                           |           | 79.27 (6.0)  | 79.00 (75, 83)       |
| Sex                           |           |              |                      |
| female                        | 97 (38%)  |              |                      |
| male                          | 159 (62%) |              |                      |
| School years                  |           |              |                      |
| < 9 years                     | 116 (45%) |              |                      |
| ≥ 9 years                     | 140 (55%) |              |                      |
| Falls in the past 12 months   |           |              |                      |
| At least one                  | 80 (31%)  |              |                      |
| None                          | 176 (69%) |              |                      |
| Smoker                        |           |              |                      |
| Current/former                | 104 (41%) |              |                      |
| Never                         | 152 (59%) |              |                      |
| Diabetes                      |           |              |                      |
| Yes                           | 73 (29%)  |              |                      |
| No                            | 183 (71%) |              |                      |
| Malignancy in Anamnesis       |           |              |                      |
| Active                        | 21 (8%)   |              |                      |
| Inactive                      | 19 (7%)   |              |                      |
| None                          | 216 (84%) |              |                      |
| BMI                           |           | 26.85 (4.8)  | 26.37 (23.74, 29.76) |
| SPMSQ                         |           | 1.50 (1.6)   | 1 (0, 2)             |
| No. medications               |           | 7.64 (3.8)   | 7 (5, 9.75)          |
| CACI                          |           | 5.72 (2.0)   | 5 (4, 7)             |
| Creatinine clearance (ml/min) |           | 60.42 (24.8) | 60.26 (42.25, 76.69) |
| Increased Troponine-T         | 166 (65%) |              |                      |
| Increased CRP                 | 115 (45%) |              |                      |
| Decreased Hemoglobin          | 102 (40%) |              |                      |

Note: BMI= body mass index; SPMSQ= Short Portable Mental Status Questionnaire (number of errors); CACI= Charlson Age Comorbidity Index. Creatinine clearance as calculated by Cockcroft & Gault formula.

12

99 The median follow-up time calculated by reverse Kaplan-Meier method was 835 days. 63 patients (25%  
 100 of the sample) died during the follow-up period. Separate controlled and uncontrolled estimates of the association  
 101 between each biomarker and all-cause mortality are presented in Table 2, associated Kaplan-Meier curves can be  
 102 found in Supplementary Figure 1. As can be taken from Table 2 and Supplementary Figure 1, positive results in  
 103 each of the three biomarkers were associated with increased all-cause mortality at follow-up. Hemoglobin showed  
 104 the weakest association to mortality and did not remain statistically significant when adjusted for confounders.

**Table 2**

*Uncontrolled and controlled associations (hazard-ratio) of biological aging related biomarkers and mortality from separate Cox-regression models (N=256).*

| Variable              | Crude HR | 95% CI        | Adjusted HR | 95% CI        |
|-----------------------|----------|---------------|-------------|---------------|
| Increased Troponine-T | 7.28     | [2.92, 18.16] | 4.41        | [1.71, 11.43] |
| Increased CRP         | 3.67     | [2.12, 6.34]  | 2.97        | [1.69, 5.23]  |
| Decreased Hemoglobin  | 2.64     | [1.60, 4.38]  | 1.55        | [0.89, 2.68]  |

Note: HR= Hazard Ratio; adjusted estimates are controlled for sex, BMI, creatinine clearance, age and comorbidity (CACI-score).

105 When all three biomarkers were combined in a joint model and therefore controlled for each other  
 106 (details in Supplementary Table 3), they were still all associated with mortality at follow-up.

107 In the main analyses, a summary score was used to predict mortality indicating how many of the three  
 108 biomarkers showed positive results in a patient (theoretical range: no positive result – three positive results).  
 109 Kaplan-Meier curves for this grouping are presented in Figure 1. The number of positive biomarkers appeared to  
 110 be strongly associated to the patient's all-cause mortality. Even when controlled for sex, BMI, creatinine  
 111 clearance, comorbidity and age as scored by the CACI, the summary score of positive biomarkers was still  
 112 associated with mortality (see Table 3). While the point-estimates for the effect sizes were notably high, this  
 113 estimation comes with considerable uncertainty as indicated by the wide 95% confidence intervals (e.g., for the  
 114 patients with three positive biomarkers vs. the no positive biomarkers reference  $HR=7.46$  and  $95\% CI= 2.12-$   
 115  $26.28$ ).

**Table 3**

Summary of cox-regression model using the composite predictor (number of positive biomarkers, theoretical range 0-3, N=256).

| Variable                   | Hazard-Ratio | 95% CI        |
|----------------------------|--------------|---------------|
| <i>Biomarker Composite</i> |              |               |
| None (n=60)                | <i>Ref.</i>  | <i>Ref.</i>   |
| One (n=63)                 | 1.54         | [0.39, 6.04]  |
| Two (n=79)                 | 4.29         | [1.25, 14.75] |
| Three (n=54)               | 7.46         | [2.12, 26.28] |
| <i>Sex</i>                 |              |               |
| Female                     | <i>Ref.</i>  | <i>Ref.</i>   |
| Male                       | 1.11         | [0.64, 1.92]  |
| BMI                        | 0.94         | [0.90, 1.00]  |
| CACI                       | 1.32         | [1.16, 1.51]  |
| Creatinine Clearance       | 1.00         | [0.98, 1.01]  |

Note: Ref. = Reference category; BMI= Body mass index; CACI= Charlson Age Comorbidity Index. Creatinine clearance estimation as calculated by Cockcroft-Gault formula. Biomarker composite describes the number of biomarkers with a positive result.

## 116 **Discussion**

117 This prospective cohort study examined the association of the three biomarkers CRP, hs-TnT and Hb  
 118 with mortality in order to improve older patient's risk stratification in the ED. The main results of this study can  
 119 be summarized as follows: First, each marker alone was associated with an increased risk of all-cause mortality  
 120 during a more than 2-year follow-up. Second, these biomarkers were to a certain degree independently associated  
 121 to patient's all-cause mortality. Third, the number of positive results on age-related biomarkers was strongly  
 122 indicative of the risk of patient's all-cause mortality.

123 As geriatric patients in the ED represent a complex clientele [2], the quick identification of those with  
 124 high-risk of adverse outcomes constitutes a considerable challenge. There are few studies which have examined  
 125 risk stratification of ED patients using a biological aging markers framework, especially from a dedicated geriatric  
 126 perspective. As Bahrmann et al. [25] similar to Wagner et al. [3] argue on the issue of this approach, combining  
 127 such biomarkers reflecting different pathophysiological pathways might be better than those which have the same  
 128 general mechanism [26]. Therefore, and based on theoretical considerations such as *inflammaging* and existent



14

1  
2  
3  
4 129 previous research tying CRP, hs-TnT, and Hb to biological aging processes across different pathways, we aimed  
5  
6 130 to provide a joint examination of those biomarkers in terms of their predictive validity regarding the mortality of  
7  
8 131 a heterogeneous sample of older ED patients, including both, frail and well performing older adults.  
9

10  
11 132 As we found in our study CRP, hs-TnT and Hb were individually all associated with older ED patient's  
12  
13 133 all-cause mortality, CRP and hs-TnT even when controlled for major confounders such as comorbidity, age,  
14  
15 134 creatinine clearance, sex, and BMI. Our study therefore largely conforms with previous research, which illustrated  
16  
17 135 an association for each marker to mortality.  
18

19 136 For instance, Bahrmann et al. showed that older patients presenting to the ED with hs-TnT levels of 108  
20  
21 137 ng/L or higher had a continuous increased risk of cardiovascular death [27]. It should be considered that elevated  
22  
23 138 serum troponin concentrations can be caused by any type of heart muscle cell injury, affected by a multitude of  
24  
25 139 factors. Aside from myocardial infarction reasons for an increase can be due to other cardiac as well as non-  
26  
27 140 cardiac diseases, such as for example myocarditis, arrhythmias, sepsis, renal failure, severe acute neurological  
28  
29 141 diseases and critical illness [28]. A recent study by Zelis et al. also estimated the predictive value of several  
30  
31 142 biomarkers, including hs-TnT, for adverse outcomes in older ED patients. In line with our results, hs-TnT showed  
32  
33 143 one of the strongest associations to mortality [37].  
34

35 144 CRP as an inflammatory marker was shown to be an independent predictor of overall, cardiovascular and  
36  
37 145 inhospital mortality, as studies by Zimmermann et al. [5] as well as by Yoshinaga et al. have indicated [29]. These  
38  
39 146 findings support the theory of *inflammaging*. The aging process leads to a paradoxically hyper-activated but at the  
40  
41 147 same time defective immune system. Depending on which of these dominates, inflammatory markers could help  
42  
43 148 to distinguish between healthy aging and age-associated pathologies or the occurrence of comorbidities [30].  
44

45  
46 149 Moreover, Han et al. recently examined apparently healthy older men and could show the association of  
47  
48 150 decreased levels of Hb with overall and cancer-related mortality [13]. Other studies have also linked lowered Hb  
49  
50 151 to mortality [12, 31].  
51

52 152 In our study, we were able to show that positive results on the presumably independent biomarkers CRP,  
53  
54 153 hs-TnT, and Hb were indicative of the older ED patient's risk of all-cause mortality during the follow-up period,  
55  
56 154 even when their effects were controlled for each other. This is in line with the assumption that they exert effects  
57  
58 155 at least in part across their own respective pathways [5, 13, 32]. We could also show that a strong association of  
59  
60 156 the number of positive biomarkers to mortality existed, even when major confounders were controlled for. These

1  
2  
3  
4 157 results support the idea that risk stratification may especially benefit from the incorporation of a multitude of  
5  
6 158 biological age-related markers that exert their effects over different physiological pathways [26]. Our exploratory  
7  
8 159 approach to examine the association of the number of positive results to mortality implies equal weighting of each  
9  
10 160 positive result. However, effect sizes for the separate biomarkers indicate that the relationship might be stronger  
11  
12 161 for selected markers (in our case, hs-TnT). This should be considered in future work, which may build on large  
13  
14 162 multicenter datasets that would resolve the issue of the high uncertainty associated with the estimates and provide  
15  
16 163 the opportunity for construction of clinical risk-scores involving these biomarkers.

17  
18  
19 164 Previous approaches to risk-stratification of older patients in the ED frequently employed questionnaire-  
20  
21 165 based methods (e.g. Identification of Seniors at Risk [33]). Although there is quite a body of research on these  
22  
23 166 approaches, they were found to be limited in their predictive validity [34, 35]. In comparison, the biological age-  
24  
25 167 related biomarkers showed relatively solid associations to the patient's all-cause mortality in this and numerous  
26  
27 168 other studies [7, 13, 29]. Concerning this matter, the cohort presented in this study was previously examined with  
28  
29 169 regards to the usefulness of a cognitive screening method for the patient's risk stratification. Even when the time-  
30  
31 170 frame of the current study was restrained to 1-year after initial ED visit, we found the association for biomarkers  
32  
33 171 of aging to mortality to be considerably stronger than the association of the cognitive measure to mortality [36].

34  
35 172 Thus, incorporation of biomarkers into the risk stratification of older patients in the ED appears to be a  
36  
37 173 convenient, feasible and low-cost approach, as blood collection is already implemented into the diagnostic  
38  
39 174 routines. In general, the assessment of biomarkers of age can also be considered a much more objective approach  
40  
41 175 than (self-) report-based measures.

#### 42 43 176 **Limitations**

44  
45  
46 177 Several limitations of this study must be taken into account. Due to the study being a prospective cohort  
47  
48 178 study with exploratory character, we refrain from causal inferences. While a cohort of older ED patients is difficult  
49  
50 179 to recruit, and the follow-up time in this study was considerably long, this cohort only constitutes a relatively  
51  
52 180 small sample. This rather small sample size, and consequently the low number of overall events, prevented us  
53  
54 181 from examining in more detail the specific interactions of the separate biomarkers. The small number of events  
55  
56 182 also causes the effects found in this study to come with considerable uncertainty, as indicated by the wide  
57  
58 183 confidence intervals. For this reason, weighting approaches required to construct clinical risk scores for  
59  
60 184 application in clinical practice were not feasible. The recruitment of the study sample was also limited to one

16

1  
2  
3  
4 185 specific CPU and is therefore as a convenience sample not representative of the more heterogeneous patient  
5  
6 186 populations present in the hospital. The CPU ward relates, amongst other things, to several specific health  
7  
8 187 problems, associated treatment approaches and reasons of hospital confinement. The preconditioned informed  
9  
10 188 consent procedure also constitutes a selection effect. Finally, while we did not use age-specific cut-offs for hs-  
11  
12 189 TnT as their use is discouraged for convenience in the guideline of the European Society of Cardiology (ESC)[38],  
13  
14 190 age-related variation of 99<sup>th</sup> percentile values might provide useful information in risk-stratification processes and  
15  
16 191 should be examined in further research.

## 17 18 192 **Conclusions**

19  
20  
21 193 As the results in this study show, biomarkers with an explicit relation to biological aging processes such  
22  
23 194 as CRP, hs-TnT and Hb were strongly associated to older ED patient's all-cause mortality. Therefore, they should  
24  
25 195 be considered as potential candidates to supplement or replace risk stratification approaches based on e.g.,  
26  
27 196 questionnaires, especially since, unlike questionnaire related methods, some of these biomarkers are already  
28  
29 197 implemented into the routine diagnostic process within the ED. Given their other properties such as a clear clinical  
30  
31 198 interpretation and objectivity, they could become part of low-cost, feasible risk-stratification methods. Future  
32  
33 199 research should address the validation of risk stratification approaches based on biological aging biomarkers in  
34  
35 200 large, multicenter, and across the clinical characteristic diverse samples, which would also allow for a deeper  
36  
37 201 examination of the interactions of the different aging-related biomarkers.

## 202 REFERENCES

- 203 1 Aminzadeh F DWB. Older adults in the emergency department: A systematic review of patterns  
204 of use, adverse outcomes, and effectiveness of interventions 2002. Available at:  
205 <https://www.sciencedirect.com/science/article/pii/S0196064402530614> Accessed November  
206 02, 2019.
- 207 2 Salvi F, Morichi V, Grilli A, et al. The elderly in the emergency department: a critical review of  
208 problems and solutions. *Intern Emerg Med* 2007;2(4):292–301. doi:10.1007/s11739-007-0081-  
209 3 [published Online First: 28 November 2007].
- 210 3 Wagner K-H, Cameron-Smith D, Wessner B, et al. Biomarkers of Aging: From Function to  
211 Molecular Biology. *Nutrients* 2016;8(6). doi:10.3390/nu8060338 [published Online First: 2 June  
212 2016].
- 213 4 De Martinis, M. et al. Inflammation markers predicting frailty and mortality in the elderly.  
214 *Experimental and Molecular Pathology* 2006;80(3):219–27. doi:10.1016/j.yexmp.2005.11.004  
215 [published Online First: Juni 2006].
- 216 5 Zimmermann, J., Herrlinger, S., Pruy, A., Metzger, T., & Wanner, C. Inflammation enhances  
217 cardiovascular risk and mortality in hemodialysis patients 1999. Available at:  
218 <https://www.sciencedirect.com/science/article/pii/S0085253815460090> Accessed October 13,  
219 2019.
- 220 6 Ridker, M P, Cushman, et al. Inflammation, Aspirin, and the Risk of Cardiovascular Disease in  
221 Apparently Healthy Men | *NEJM* 2009. Available at:  
222 <https://www.nejm.org/doi/full/10.1056/nejm199704033361401> Accessed October 13, 2019.
- 223 7 Meigher S, Thode HC, Peacock WF, et al. Causes of Elevated Cardiac Troponins in the  
224 Emergency Department and Their Associated Mortality. *Acad Emerg Med* 2016;23(11):1267–  
225 73. doi:10.1111/acem.13033 [published Online First: 20 June 2016].
- 226 8 Bardaji, A., Cediél, G., Carrasquer, A., de Castro, R., Sánchez, R., & Boqué, C. Troponin Elevation  
227 in Patients Without Acute Coronary Syndrome 2015. Available at:  
228 <https://www.sciencedirect.com/science/article/pii/S188558571500033X> Accessed October 13,  
229 2019.
- 230 9 Groot B de, Verdoorn RCW, Lameijer J, et al. High-sensitivity cardiac troponin T is an  
231 independent predictor of inhospital mortality in emergency department patients with  
232 suspected infection: a prospective observational derivation study. *Emerg Med J*  
233 2014;31(11):882–88. doi:10.1136/emered-2013-202865 [published Online First: 21 August  
234 2013].
- 235 10 deFilippi CR, Lemos JA de, Christenson RH, et al. Association of serial measures of cardiac  
236 troponin T using a sensitive assay with incident heart failure and cardiovascular mortality in  
237 older adults. *JAMA* 2010;304(22):2494–502. doi:10.1001/jama.2010.1708 [published Online  
238 First: 8 December 2010].
- 239 11 Kaura A, Panoulas V, Glampson B, et al. Association of troponin level and age with mortality in  
240 250 000 patients: cohort study across five UK acute care centres. *BMJ* 2019;367:l6055  
241 (accessed 28 Aug 2020).

- 1  
2  
3  
4 242 12 Culleton BF, Manns BJ, Zhang J, et al. Impact of anemia on hospitalization and mortality in  
5 243 older adults. *Blood* 2006;107(10):3841–46. doi:10.1182/blood-2005-10-4308 [published Online  
6 244 First: 15 May 2006].
- 8 245 13 Han SV, Park M, Kwon Y-M, et al. Mild Anemia and Risk for All-Cause, Cardiovascular and  
9 246 Cancer Deaths in Apparently Healthy Elderly Koreans. *Korean J Fam Med* 2019;40(3):151–58.  
10 247 doi:10.4082/kjfm.17.0089 [published Online First: 17 January 2019].
- 12 248 14 den Elzen WPJ, Willems JM, Westendorp RGJ, et al. Effect of anemia and comorbidity on  
13 249 functional status and mortality in old age: results from the Leiden 85-plus Study. *CMAJ*  
14 250 2009;181(3-4):151–57. doi:10.1503/cmaj.090040 [published Online First: 4 August 2009].
- 16 251 15 Pfeiffer E. A short portable mental status questionnaire for the assessment of organic brain  
17 252 deficit in elderly patients. *J Am Geriatr Soc* 1975;23(10):433–41.
- 19 253 16 Lupa P.B. SW. Referenzwerte der wichtigsten Laborparameter 2020. Available at:  
20 254 [https://link.springer.com/chapter/10.1007/978-3-662-54507-2\\_159#citeas](https://link.springer.com/chapter/10.1007/978-3-662-54507-2_159#citeas) Accessed June 11,  
21 255 2020.
- 23 256 17 Morrow David A, Rifai Nader, Antman Elliott M, et al. C-Reactive Protein Is a Potent Predictor  
24 257 of Mortality Independently of and in Combination With Troponin T in Acute Coronary  
25 258 Syndromes: A TIMI 11A Substudy. *J Am Coll Cardiol* 1998;31(7):1460–65 (accessed 27 May  
26 259 2021).
- 28 260 18 Rifai N, Ridker PM. Population distributions of C-reactive protein in apparently healthy men  
29 261 and women in the United States: implication for clinical interpretation. *Clin Chem*  
30 262 2003;49(4):666–69 (accessed 13 Jun 2020).
- 32 263 19 Giannitsis E, Kurz K, Hallermayer K, et al. Analytical validation of a high-sensitivity cardiac  
33 264 troponin T assay. *Clin Chem* 2010;56(2):254–61 (accessed 11 Jun 2020).
- 35 265 20 Mueller-Hennessen M, Lindahl B, Giannitsis E, et al. Diagnostic and prognostic implications  
36 266 using age- and gender-specific cut-offs for high-sensitivity cardiac troponin T - Sub-analysis  
37 267 from the TRAPID-AMI study. *Int J Cardiol* 2016;209:26–33 (accessed 11 Jun 2020).
- 39 268 21 Riva E, Tettamanti M, Mosconi P, et al. Association of mild anemia with hospitalization and  
40 269 mortality in the elderly: the Health and Anemia population-based study. *Haematologica*  
41 270 2009;94(1):22–28 (accessed 11 Jun 2020).
- 43 271 22 Weltgesundheitsorganisation. Research into environmental pollution: Report of five WHO  
44 272 scientific groups. Geneva: World Health Organization 1968.
- 46 273 23 Charlson M, Szatrowski TP, Peterson J, et al. Validation of a combined comorbidity index.  
47 274 *Journal of Clinical Epidemiology* 1994;47(11):1245–51 (accessed 11 Jun 2020).
- 49 275 24 Cockcroft DW, Gault MH. Prediction of creatinine clearance from serum creatinine. *Nephron*  
50 276 1976;16(1):31–41 (accessed 30 Aug 2020).
- 52 277 25 Bahrman P, Bahrman A, Hofner B, et al. Multiple biomarker strategy for improved diagnosis  
53 278 of acute heart failure in older patients presenting to the emergency department. *European*  
54 279 *Heart Journal: Acute Cardiovascular Care* 2015;4(2):137–47 (accessed 8 Aug 2020).
- 56 280 26 Manzano L, Escobar C, Cleland JGF, et al. Diagnosis of elderly patients with heart failure. *Eur J*  
57 281 *Heart Fail* 2012;14(10):1097–103 (accessed 10 Aug 2020).
- 59 282 27 Bahrman P, Christ M, Bahrman A, et al. A 3-hour diagnostic algorithm for non-ST-elevation  
60 283 myocardial infarction using high-sensitivity cardiac troponin T in unselected older patients  
284 284 presenting to the emergency department. *J Am Med Dir Assoc* 2013;14(6):409–16 (accessed 7  
285 285 Aug 2020).

- 1  
2  
3  
4 286 28 Suzuki K, Komukai K, Nakata K, et al. The Usefulness and Limitations of Point-of-care Cardiac  
5 287 Troponin Measurement in the Emergency Department. *Intern Med* 2018;57(12):1673–80  
6 288 (accessed 28 Aug 2020).
- 7  
8 289 29 Yoshinaga R, Doi Y, Ayukawa K, et al. High-sensitivity C reactive protein as a predictor of  
9 290 inhospital mortality in patients with cardiovascular disease at an emergency department: a  
10 291 retrospective cohort study. *BMJ Open* 2017;7(10):e015112.  
11 292 <https://bmjopen.bmj.com/content/7/10/e015112.citation-tools>.
- 12  
13 293 30 Larbi A, Franceschi C, Mazzatti D, et al. Aging of the immune system as a prognostic factor for  
14 294 human longevity. *Physiology (Bethesda)* 2008;23:64–74 (accessed 27 May 2021).
- 15  
16 295 31 Zakai NA, Katz R, Hirsch C, et al. A prospective study of anemia status, hemoglobin  
17 296 concentration, and mortality in an elderly cohort: the Cardiovascular Health Study. *Arch Intern*  
18 297 *Med* 2005;165(19):2214–20.
- 19  
20 298 32 Bahrmann P, Bahrmann A, Breithardt O-A, et al. Additional diagnostic and prognostic value of  
21 299 copeptin ultra-sensitive for diagnosis of non-ST-elevation myocardial infarction in older  
22 300 patients presenting to the emergency department. *Clin Chem Lab Med* 2013;51(6):1307–19  
23 301 (accessed 7 Aug 2020).
- 24  
25 302 33 McCusker J, Bellavance F, Cardin S, et al. Detection of older people at increased risk of adverse  
26 303 health outcomes after an emergency visit: the ISAR screening tool. *J Am Geriatr Soc*  
27 304 1999;47(10):1229–37.
- 28  
29 305 34 Galvin R, Gillett Y, Wallace E, et al. Adverse outcomes in older adults attending emergency  
30 306 departments: a systematic review and meta-analysis of the Identification of Seniors At Risk  
31 307 (ISAR) screening tool. *Age Ageing* 2017;46(2):179–86. doi:10.1093/ageing/afw233 [published  
32 308 Online First: 15 December 2016].
- 33  
34 309 35 Carpenter CR, Shelton E, Fowler S, et al. Risk factors and screening instruments to predict  
35 310 adverse outcomes for undifferentiated older emergency department patients: a systematic  
36 311 review and meta-analysis. *Acad Emerg Med* 2015;22(1):1–21. doi:10.1111/acem.12569  
37 312 [published Online First: 6 January 2015].
- 38  
39 313 36 Schönstein A, Wahl H-W, Katus HA, et al. SPMSQ zur Risikostratifizierung älterer Patienten in  
40 314 der Notaufnahme Eine explorative prospektive Kohortenstudie. *Z Gerontol Geriatr*  
41 315 2019;52(Suppl 4):222–28 (accessed 10 Aug 2020).
- 42  
43 316 37 Zelis N, Hundscheid R, Buijs J, et al. Value of biomarkers in predicting mortality in older medical  
44 317 emergency department patients: a Dutch prospective study. *BMJ Open* 2021;11(1):e042989.  
45 318 doi:10.1136/bmjopen-2020-042989 [published Online First: 31 January 2021].
- 46  
47 319 38 Collet J-P, Thiele H, Barbato E, et al. 2020 ESC Guidelines for the management of acute  
48 320 coronary syndromes in patients presenting without persistent ST-segment elevation. *Eur Heart*  
49 321 *J* 2020. doi:10.1093/eurheartj/ehaa575 [published Online First: 29 August 2020].
- 50  
51  
52  
53  
54  
55  
56  
57  
58  
59  
60

1  
2  
3  
4  
5  
6  
7  
8  
9  
10  
11  
12  
13  
14  
15  
16  
17  
18  
19  
20  
21  
22  
23  
24  
25  
26  
27  
28  
29  
30  
31  
32  
33  
34  
35  
36  
37  
38  
39  
40  
41  
42  
43  
44  
45  
46  
47  
48  
49  
50  
51  
52  
53  
54  
55  
56  
57  
58  
59  
60

For peer review only

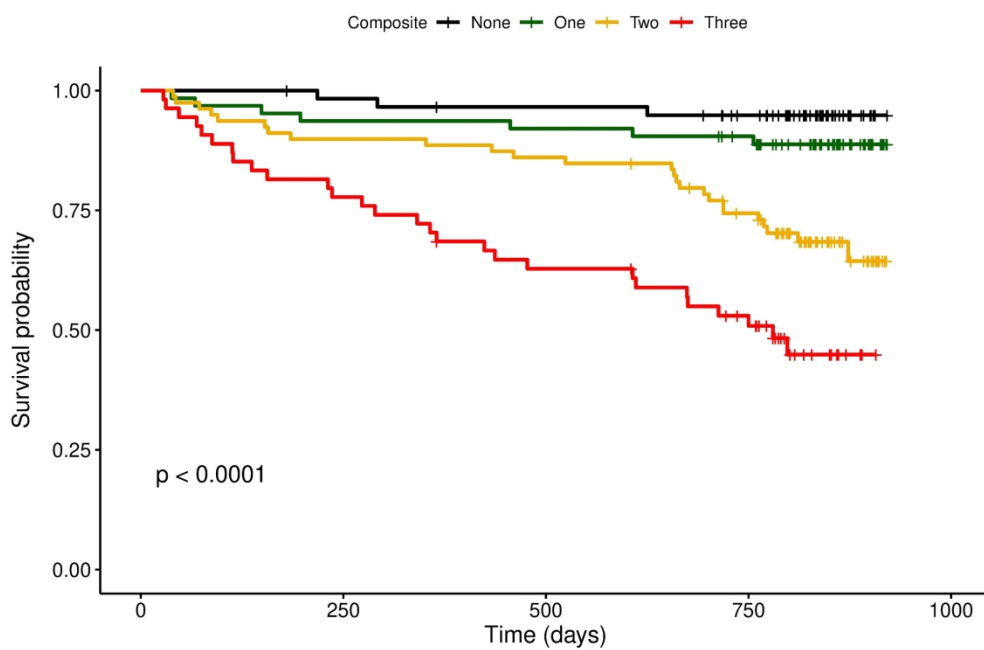

Number at risk

| Composite | 0  | 250 | 500 | 750 | 1000 |
|-----------|----|-----|-----|-----|------|
| None      | 60 | 58  | 55  | 48  | 0    |
| One       | 63 | 59  | 58  | 54  | 0    |
| Two       | 79 | 71  | 68  | 55  | 0    |
| Three     | 54 | 42  | 33  | 25  | 0    |

Time (days)

210x188mm (300 x 300 DPI)



## Supplement

## Supplementary Table 1

*Primary diagnoses in the sample (N=256).*

| Primary diagnoses                                                                     | Number (%) of patients (total N=256) |
|---------------------------------------------------------------------------------------|--------------------------------------|
| <i>Group 1:</i> Suspicion/Exclusion of myocardial infarction or Myocardial infarction | 66 (26%)                             |
| <i>Group 2:</i> Cardiac decompensation                                                | 60 (23%)                             |
| <i>Group 3:</i> Heart rhythm disturbances*                                            | 48 (19%)                             |
| <i>Group 4:</i> Hypertensive derailment                                               | 17 ( 7%)                             |
| <i>Group 5:</i> Others                                                                | 65 (25%)                             |

*Note:* \*(Atrial fibrillation/atrial flutter, tachyarrhythmia absoluta).

## Supplementary Table 2

*Frequent secondary diagnoses (N=256).*

| Most common secondary diagnoses      | Number (%) of patients (total N=256) |
|--------------------------------------|--------------------------------------|
| Renal insufficiency / kidney disease | 51 (20%)                             |
| Heart failure                        | 33 (13%)                             |
| Anemia                               | 21 ( 8%)                             |
| Pneumonia                            | 30 (12%)                             |

## Supplementary Table 3

*Uncontrolled and controlled associations (hazard-ratio) of biological aging related biomarkers and mortality from Cox-Regression models including all biomarkers as predictors simultaneously (N=256).*

| Variable              | HR (Model 1) | 95% CI        | HR (Model 2) | 95% CI       |
|-----------------------|--------------|---------------|--------------|--------------|
| Increased Troponine-T | 4.84         | [1.90, 12.32] | 3.61         | [1.39, 9.40] |
| Increased CRP         | 2.57         | [1.47, 4.48]  | 2.64         | [1.50, 4.66] |
| Decreased Hemoglobin  | 1.68         | [1.00, 2.81]  | 1.20         | [0.69, 2.07] |

*Note:* HR= Hazard Ratio; Model 1: Survival predicted by the three dummy coded biomarker variables. Model 2: Survival predicted by the three dummy coded biomarker variables as well as covariates sex, BMI, creatinine clearance, age and comorbidity (CACI-score). Estimates within a column are therefore from the same model.

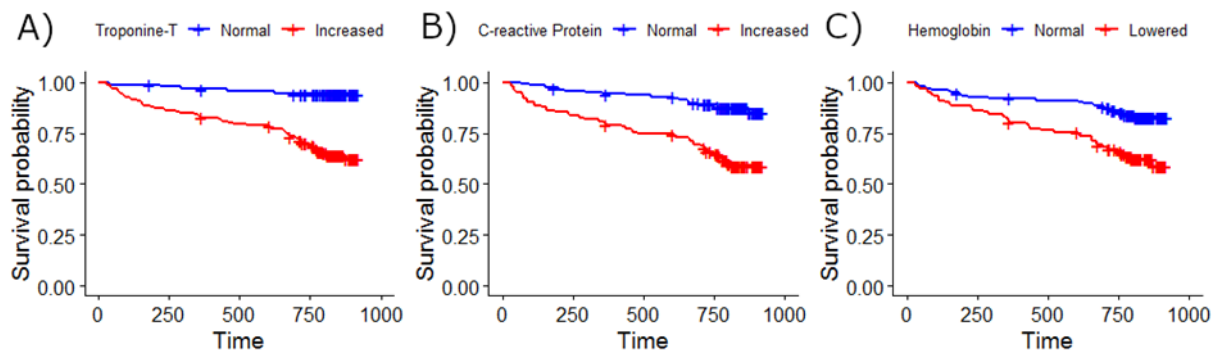

Supplementary Figure 1. Kaplan-Meier curves for patients grouped by A) increased Troponine-T B) increased C - reactive Protein and C) lowered Hemoglobin. Time units are days.

## STROBE 2007 (v4) Statement—Checklist of items that should be included in reports of cohort studies

| Section/Topic            | Item # | Recommendation                                                                                                                                                                       | Reported on page # |
|--------------------------|--------|--------------------------------------------------------------------------------------------------------------------------------------------------------------------------------------|--------------------|
| Title and abstract       | 1      | (a) Indicate the study's design with a commonly used term in the title or the abstract                                                                                               | 1                  |
|                          |        | (b) Provide in the abstract an informative and balanced summary of what was done and what was found                                                                                  | 3                  |
| <b>Introduction</b>      |        |                                                                                                                                                                                      | <b>7</b>           |
| Background/rationale     | 2      | Explain the scientific background and rationale for the investigation being reported                                                                                                 | 7                  |
| Objectives               | 3      | State specific objectives, including any prespecified hypotheses                                                                                                                     | 7                  |
| <b>Methods</b>           |        |                                                                                                                                                                                      | <b>8-10</b>        |
| Study design             | 4      | Present key elements of study design early in the paper                                                                                                                              | 8                  |
| Setting                  | 5      | Describe the setting, locations, and relevant dates, including periods of recruitment, exposure, follow-up, and data collection                                                      | 8                  |
| Participants             | 6      | (a) Give the eligibility criteria, and the sources and methods of selection of participants. Describe methods of follow-up                                                           | 8                  |
|                          |        | (b) For matched studies, give matching criteria and number of exposed and unexposed                                                                                                  | N/A                |
| Variables                | 7      | Clearly define all outcomes, exposures, predictors, potential confounders, and effect modifiers. Give diagnostic criteria, if applicable                                             | 8 and 9            |
| Data sources/measurement | 8*     | For each variable of interest, give sources of data and details of methods of assessment (measurement). Describe comparability of assessment methods if there is more than one group | 8 and 9            |
| Bias                     | 9      | Describe any efforts to address potential sources of bias                                                                                                                            | 9                  |
| Study size               | 10     | Explain how the study size was arrived at                                                                                                                                            | 8 and 10           |
| Quantitative variables   | 11     | Explain how quantitative variables were handled in the analyses. If applicable, describe which groupings were chosen and why                                                         | 8, 9, 10           |
| Statistical methods      | 12     | (a) Describe all statistical methods, including those used to control for confounding                                                                                                | 9, 10              |
|                          |        | (b) Describe any methods used to examine subgroups and interactions                                                                                                                  | 9                  |
|                          |        | (c) Explain how missing data were addressed                                                                                                                                          | 10                 |
|                          |        | (d) If applicable, explain how loss to follow-up was addressed                                                                                                                       | N/A                |
|                          |        | (e) Describe any sensitivity analyses                                                                                                                                                | 9, 10              |

|                          |     |                                                                                                                                                                                                              |                      |
|--------------------------|-----|--------------------------------------------------------------------------------------------------------------------------------------------------------------------------------------------------------------|----------------------|
| <b>Results</b>           |     |                                                                                                                                                                                                              | <b>9-12</b>          |
| Participants             | 13* | (a) Report numbers of individuals at each stage of study—eg numbers potentially eligible, examined for eligibility, confirmed eligible, included in the study, completing follow-up, and analysed            | 10                   |
|                          |     | (b) Give reasons for non-participation at each stage                                                                                                                                                         | 10                   |
|                          |     | (c) Consider use of a flow diagram                                                                                                                                                                           | -                    |
| Descriptive data         | 14* | (a) Give characteristics of study participants (eg demographic, clinical, social) and information on exposures and potential confounders                                                                     | 9 and 10             |
|                          |     | (b) Indicate number of participants with missing data for each variable of interest                                                                                                                          | 10, Fig. 1           |
|                          |     | (c) Summarise follow-up time (eg, average and total amount)                                                                                                                                                  | 12                   |
| Outcome data             | 15* | Report numbers of outcome events or summary measures over time                                                                                                                                               | 12                   |
| Main results             | 16  | (a) Give unadjusted estimates and, if applicable, confounder-adjusted estimates and their precision (eg, 95% confidence interval). Make clear which confounders were adjusted for and why they were included | 12, Tables & Figures |
|                          |     | (b) Report category boundaries when continuous variables were categorized                                                                                                                                    | 8, 9                 |
|                          |     | (c) If relevant, consider translating estimates of relative risk into absolute risk for a meaningful time period                                                                                             | see Fig. 1           |
| Other analyses           | 17  | Report other analyses done—eg analyses of subgroups and interactions, and sensitivity analyses                                                                                                               | -                    |
| <b>Discussion</b>        |     |                                                                                                                                                                                                              | <b>13-16</b>         |
| Key results              | 18  | Summarise key results with reference to study objectives                                                                                                                                                     | 13                   |
| <b>Limitations</b>       |     |                                                                                                                                                                                                              | <b>15-16</b>         |
| Interpretation           | 20  | Give a cautious overall interpretation of results considering objectives, limitations, multiplicity of analyses, results from similar studies, and other relevant evidence                                   | 15, 16               |
| Generalisability         | 21  | Discuss the generalisability (external validity) of the study results                                                                                                                                        | 15, 16               |
| <b>Other information</b> |     |                                                                                                                                                                                                              |                      |
| Funding                  | 22  | Give the source of funding and the role of the funders for the present study and, if applicable, for the original study on which the present article is based                                                | 3                    |

# BMJ Open

## Exploring biomarkers in routine diagnostics for the risk stratification of older patients in the chest pain unit: A prospective cohort study.

|                                 |                                                                                                                                                                                                                                                                                                                                                                                                                                                                                                                                                                                                                                                                                                                                                       |
|---------------------------------|-------------------------------------------------------------------------------------------------------------------------------------------------------------------------------------------------------------------------------------------------------------------------------------------------------------------------------------------------------------------------------------------------------------------------------------------------------------------------------------------------------------------------------------------------------------------------------------------------------------------------------------------------------------------------------------------------------------------------------------------------------|
| Journal:                        | <i>BMJ Open</i>                                                                                                                                                                                                                                                                                                                                                                                                                                                                                                                                                                                                                                                                                                                                       |
| Manuscript ID                   | bmjopen-2021-056674.R1                                                                                                                                                                                                                                                                                                                                                                                                                                                                                                                                                                                                                                                                                                                                |
| Article Type:                   | Original research                                                                                                                                                                                                                                                                                                                                                                                                                                                                                                                                                                                                                                                                                                                                     |
| Date Submitted by the Author:   | 28-Mar-2022                                                                                                                                                                                                                                                                                                                                                                                                                                                                                                                                                                                                                                                                                                                                           |
| Complete List of Authors:       | Kunz, Anna Lisa ; University Hospital Heidelberg, Departement of Cardiology, Angiology and Pneumology<br>Schönstein, Anton; Heidelberg University, Network Aging Research<br>Bahrmann, Philipp; University Hospital Heidelberg, Department of Cardiology, Angiology and Pneumology<br>Giannitsis, Evangelos; University Hospital Heidelberg Medical Clinic, Department of Cardiology, Angiology and Pulmonology<br>Wahl, Hans-Werner; Heidelberg University, Network Aging Research and Institute of Psychology<br>Katus, Hugo; University of Heidelberg, Cardiology and Pneumology<br>Frey, Norbert; University Hospital Heidelberg Medical Clinic, Departement of Cardiology, Angiology and Pneumology<br>Bahrmann, Anke; University of Heidelberg, |
| <b>Primary Subject Heading</b>: | Geriatric medicine                                                                                                                                                                                                                                                                                                                                                                                                                                                                                                                                                                                                                                                                                                                                    |
| Secondary Subject Heading:      | Cardiovascular medicine, Emergency medicine                                                                                                                                                                                                                                                                                                                                                                                                                                                                                                                                                                                                                                                                                                           |
| Keywords:                       | GERIATRIC MEDICINE, CARDIOLOGY, Risk management < HEALTH SERVICES ADMINISTRATION & MANAGEMENT, Cardiology < INTERNAL MEDICINE                                                                                                                                                                                                                                                                                                                                                                                                                                                                                                                                                                                                                         |
|                                 |                                                                                                                                                                                                                                                                                                                                                                                                                                                                                                                                                                                                                                                                                                                                                       |

SCHOLARONE™  
Manuscripts

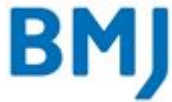

I, the Submitting Author has the right to grant and does grant on behalf of all authors of the Work (as defined in the below author licence), an exclusive licence and/or a non-exclusive licence for contributions from authors who are: i) UK Crown employees; ii) where BMJ has agreed a CC-BY licence shall apply, and/or iii) in accordance with the terms applicable for US Federal Government officers or employees acting as part of their official duties; on a worldwide, perpetual, irrevocable, royalty-free basis to BMJ Publishing Group Ltd ("BMJ") its licensees and where the relevant Journal is co-owned by BMJ to the co-owners of the Journal, to publish the Work in this journal and any other BMJ products and to exploit all rights, as set out in our [licence](#).

The Submitting Author accepts and understands that any supply made under these terms is made by BMJ to the Submitting Author unless you are acting as an employee on behalf of your employer or a postgraduate student of an affiliated institution which is paying any applicable article publishing charge ("APC") for Open Access articles. Where the Submitting Author wishes to make the Work available on an Open Access basis (and intends to pay the relevant APC), the terms of reuse of such Open Access shall be governed by a Creative Commons licence – details of these licences and which [Creative Commons](#) licence will apply to this Work are set out in our licence referred to above.

Other than as permitted in any relevant BMJ Author's Self Archiving Policies, I confirm this Work has not been accepted for publication elsewhere, is not being considered for publication elsewhere and does not duplicate material already published. I confirm all authors consent to publication of this Work and authorise the granting of this licence.

1

2  
3  
4 **Exploring biomarkers in routine diagnostics for the risk stratification of older patients in the chest pain**  
5 **unit: A prospective cohort study.**  
6  
7  
8  
9

10 Anna Lisa Kunz<sup>1</sup>, Anton Schönstein<sup>2</sup>, Philipp Bahrmann<sup>1</sup>, Evangelos Giannitsis<sup>1</sup>, Hans-Werner Wahl<sup>2,3</sup>, Hugo  
11  
12 A. Katus<sup>1</sup>, Norbert Frey<sup>1</sup> & Anke Bahrmann<sup>1,2</sup>  
13  
14  
15  
16

17 <sup>1</sup>Department of Cardiology, Angiology and Pneumology, University Hospital of Heidelberg, Germany  
18  
19

20 <sup>2</sup>Network Aging Research (NAR), Heidelberg University, Heidelberg, Germany  
21  
22

23 <sup>3</sup>Institute of Psychology, Heidelberg University, Heidelberg, Germany  
24  
25  
26  
27  
28  
29  
30  
31

32 **Author information:**  
33

34 Anna Lisa Kunz, Department of Cardiology, Angiology and Pneumology, Heidelberg University Hospital,  
35 Heidelberg, Germany.  
36  
37

38 Anton Schönstein, MSc, Network Aging Research, Heidelberg University, Heidelberg, Germany.  
39  
40

41 Philipp Bahrmann, MD, MHBA, Department of Cardiology, Angiology and Pneumology, Heidelberg  
42 University Hospital, Heidelberg, Germany.  
43  
44

45 Evangelos Giannitsis, MD, Department of Cardiology, Angiology and Pneumology, Heidelberg University  
46 Hospital, Heidelberg, Germany.  
47  
48

49 Hans-Werner Wahl, PhD, Network Aging Research & Institute of Psychology, Heidelberg University,  
50 Heidelberg, Germany.  
51  
52  
53

54 Hugo A. Katus, MD, Department of Cardiology, Angiology and Pneumology, Heidelberg University Hospital,  
55 Heidelberg, Germany.  
56  
57  
58  
59  
60

2

1  
2  
3  
4 Norbert Frey, MD, Department of Cardiology, Angiology and Pneumology, Heidelberg University Hospital,  
5  
6 Heidelberg, Germany.  
7

8  
9 Anke Bahrmann, MD, Department of Cardiology, Angiology and Pneumology, Heidelberg University Hospital  
10  
11 & Network Aging Research, University of Heidelberg, Heidelberg, Germany.  
12  
13  
14  
15

16 **Corresponding author:**  
17

18  
19 (1) Anke Bahrmann, Department of Cardiology, Angiology and Pneumology, Heidelberg University  
20  
21 Hospital, Im Neuenheimer Feld 410, 69120 Heidelberg, Germany.  
22

23 E-Mail: [anke.bahrmann@med.uni-heidelberg.de](mailto:anke.bahrmann@med.uni-heidelberg.de)  
24

25 Phone: +49/(0)6221-568676  
26  
27  
28  
29  
30  
31  
32  
33  
34  
35  
36  
37  
38  
39  
40  
41  
42  
43  
44  
45  
46  
47  
48  
49  
50  
51  
52  
53  
54  
55  
56  
57  
58  
59  
60



3

1  
2  
3  
4  
5  
6  
7  
8  
9  
10  
11  
12  
13  
14  
15  
16  
17  
18  
19  
20  
21  
22  
23  
24  
25  
26  
27  
28  
29  
30  
31  
32  
33  
34  
35  
36  
37  
38  
39  
40  
41  
42  
43  
44  
45  
46  
47  
48  
49  
50  
51  
52  
53  
54  
55  
56  
57  
58  
59  
60

For peer review only

4

**Abstract:**

**Objectives:** This study aims to estimate the association of the often in daily clinical practice used biological age-related biomarkers hs-TnT, CRP and Hemoglobin (Hb) with all-cause mortality for the purpose of older patient's risk stratification in the emergency department (ED).

**Design:** Exploratory, prospective cohort study with a follow-up at 2.5 years after recruitment start. For the predictors, data from the hospital files including the routinely applied biological age-related biomarkers hs-TnT, CRP and Hemoglobin (Hb) were supplemented by a questionnaire.

**Setting:** A cardiological ED, chest pain unit, of the university hospital in Heidelberg, Germany.

**Participants:** N=256 cardiological ED patients with a minimum age of 70 years and the capability to informed consent.

**Primary outcome measures:** The primary outcome of this study was all-cause mortality which was assessed by requesting registry office information.

**Results:** Among N=256 patients 63 died over the follow-up period. Positive results in each of the three biomarkers alone as well as the combination were associated with increased all-cause mortality at follow-up. The number of positive age-related biomarkers appeared to be strongly indicative of the risk of mortality, even when controlled for major confounders (age, sex, BMI, creatinine clearance, and comorbidity).

**Conclusions:** In older ED patients, biomarkers explicitly related to biological aging processes such as hs-TnT, CRP and Hb were independently of each other as well as combined associated with an increased risk of all-cause mortality. Thus, they may have the potential to be used to supplement the general risk stratification of older patients in the ED. Validation of the results in a large dataset is needed.

**Key words:** troponin, CRP, hemoglobin, mortality, routine diagnostics.

**Strengths and limitations of this study:**

- The prospective design and the 2.5 years long follow-up period with few censored observations at early times are strengths of this study.

5

- As information about medical history and diagnoses received from the visit to the ED were available, effect estimates could be controlled for major confounders.
- Limitations of this study are mainly the exploratory approach, the single-center design, and the relatively small number of events.

**Declarations:**

**Funding Statement:** This research received no specific grant from any funding agency in the public, commercial or not-for-profit sectors. A.S. is a member of the interdisciplinary Graduate Program “People with Dementia in General Hospitals”, located at the Network Aging Research (NAR), Heidelberg University, Germany, and received a Doctoral Fellowship funded by the Robert Bosch Foundation, Stuttgart, Germany.

**Competing interest statement:****Anna Lisa Kunz**

No funds, grants, or other support to report.

**Anton Schönstein, MSc**

A. Schönstein has received research grants from the Robert Bosch Foundation.

**Philipp Bahrmann, MD, MHBA**

P. Bahrmann has received no funds, grants, or other support for this manuscript.

**Evangelos Giannitsis, MD**

E. Giannitsis has received research grants and honoraria from Roche Diagnostics, Bayer, and Mitsubishi Chemicals.

**Hans-Werner Wahl, PhD**

No funds, grants, or other support to report.

**Hugo A. Katus, MD**

H.A. Katus has received honoraria from AstraZeneca, Daiichi Sankyo, Boehringer Ingelheim, Berlin-Chemie, Bayer Vital and Novo Nordisk. He developed the cTnT assay, but the Troponin patent has expired.

6

**Norbert Frey, MD**

N. Frey has received no funds, grants, or other support to report.

**Anke Bahrmann, MD**

A. Bahrmann has received research support for her other project the Trade Study (Transport and Delirium in Elderly Study) from the Innovation Committee by the Joint Federal Committee (G-BA), but not for this study. A. Bahrmann has received speaking engagements from Bayer, Pfizer, Lilly, Novartis, Boehringer Ingelheim, Daiichi Sankyo, Novo Nordisk and Sanofi Aventis.

**Availability of data and material:** Data are available on reasonable request.

**Code availability:** The code for the analyses conducted in this study can be made available on request.

**Author contributions:****Study concept and design:**

Kunz, A. L., Schönstein, A. Wahl, H.-W., Giannitsis, E., Katus, H. A., Bahrmann, A.

**Acquisition of data:**

Schönstein, A., Kunz, A. L.

**Analysis and interpretation of data:**

Schönstein A., Kunz, A. L., Bahrmann, P., Bahrmann, A.

**Drafting of the manuscript:**

Kunz, A. L., Schönstein, A., Bahrmann, P., Giannitsis, E., Wahl, H.-W., Katus, H. A., Frey, N., Bahrmann, A.

**Critical revision of the manuscript for important intellectual content:**

Kunz, A. L., Schönstein, A., Bahrmann, P., Giannitsis, E., Wahl, H.-W., Katus, H. A., Frey, N., Bahrmann, A.

**Ethics approval:**

The research reported in this paper was conducted in accordance with the ethical standards as laid down in the 1964 Declaration of Helsinki and the protocol was approved by the ethics committee of the medical faculty at the University of Heidelberg (S-455/2016).

7

**Consent to participate:** Informed consent was obtained for all individual participants included in the study.

**Acknowledgements:** We thank the patients who participated in this study.

**Word count (abstract): 258**

**Word count (main text): 3422**

**Tables: 3**

**Figures: 2**

For peer review only

## 1 Introduction

2 Older adults are an increasing population and frequent users of the emergency department (ED) setting  
3 [1]. As a challenging clientele they frequently present with atypical symptoms, poly medication, and unclear  
4 medical history in the ED [2] and physicians then face the challenge of quickly identifying those patients with a  
5 high-risk of adverse outcomes. Strategies to combine biomarkers indicative of biological age (see Wagner et al.  
6 [3]) may enhance risk stratification of older and geriatric patients in the ED, due to their objectivity and clear  
7 clinical implications. From a biomarkers of aging framework three distinct biomarkers (C-reactive protein, high-  
8 sensitive troponin-T, and hemoglobin) are frequently encountered in routine diagnostic procedures.

9 Established theories of immune-senescence and „*inflammaging*“ describe biological aging as a chronic,  
10 low-grade inflammatory status [4]. In accordance with this, markers such as C-reactive protein (CRP) have shown  
11 their potential for the prognosis of older people in terms of frailty and mortality [5] as well as in terms of events  
12 such as myocardial infarction or stroke [6].

13 Similarly, high-sensitivity troponins can serve as biomarkers of age. Troponins are regulator proteins of  
14 the contractile apparatus and enter the bloodstream in case of cardiomyocyte damage. The high-sensitivity  
15 troponins (hs-TnT) showed a notable predictive validity regarding mortality as well as other outcomes such as  
16 myocardial infarction or stroke in numerous studies [7–11]. It was also found that these effects of elevated  
17 troponins are independent of their etiology [7]. They thus mark a general risk factor that must be urgently noticed  
18 before any further treatment.

19 Further, geriatric patients frequently have decreased levels of hemoglobin in form of anemia [12].  
20 Recently, a study by Han et al. found that in apparently healthy older people the occurrence of anemia is associated  
21 with an increased rate of hospitalization and mortality [13], irrespective of the underlying comorbidities [14].

22 In this study we therefore aim to estimate the association of the biomarkers C-reactive protein, high-  
23 sensitive troponin-T, and hemoglobin, with older ED patient’s all-cause mortality. Accordingly, we expect an  
24 increased all-cause mortality with elevated cardiac or inflammation markers or low hemoglobin levels, even when  
25 age, overall comorbidity and other variables (sex, BMI, renal functioning) are controlled for. Given the differential  
26 mechanisms in the pathways of these biomarkers, we also hypothesize that the risk of mortality will increase even  
27 further when these different markers interact, and a patient therefore shows more than one abnormal result.

## 28 **Methods**

### 29 Study design, setting, and participants

30 The study's design was a single-center exploratory, prospective cohort study. It was conducted in the  
31 chest pain unit (CPU) with 12 beds as part of the cardiological ED of a university hospital (114 beds in the  
32 cardiological department overall). In total, 260 cardiological ED patients with a minimum age of 70 years were  
33 recruited (participation rate  $\approx$  76%). Therefore, the study is designed for older chest pain unit patients in order to  
34 improve geriatric risk-stratification. The first patient was recruited in July 2017 and the last one in May 2018.  
35 Patients were recruited only after the first examination by the ED physician. Also, on the basis of this initial  
36 examination, patients were excluded in cases of missing informed consent or an expected life expectancy of less  
37 than 24h. Thus, patients who were in a life-threatening condition and therefore unable to be interviewed or to  
38 benefit in any way from a more geriatric risk stratification were excluded. Further, patients that were isolated due  
39 to transmission-based precautions had to be excluded from the study. Since all included participants were treated  
40 in a chest pain unit, the cohort of this study consists of selected cardiological patients.

41 Baseline information was assessed by using a questionnaire, in which the Short Portable Mental  
42 Questionnaire (SPMSQ) [15] was integrated, and additionally by extracting relevant data from the hospital files.  
43 Follow-up data for this study was collected by requesting registry office information on mortality roughly 2.5  
44 years after recruitment of the first patient.

45 Based on the cognitive performance on the Short Portable Mental Status Questionnaire [15], about 23%  
46 of the participants had at least a minor form of cognitive impairment. Participants presented to the cardiological  
47 ED with numerous symptoms, including dyspnea (59%), thorax pain (20%), and angina pectoris (18%), vertigo  
48 (9%) and palpitations (8%). Frequent primary diagnoses were suspicion/exclusion of myocardial infarction (26%),  
49 cardiac decompensation (23%), and heart rhythm disturbances (19%). Further information on primary and  
50 secondary diagnoses of the sample are presented in detail in Supplementary Tables 1 and 2.

51 This research was conducted in accordance with the ethical standards as laid down in the 1964  
52 Declaration of Helsinki. The protocol was approved by the ethics committee of the medical faculty at the  
53 University of Heidelberg (S-455/2016).

### 54 Patient and public involvement

10

1  
2  
3  
4 55 No patient involved.  
5  
6

7 56 Study variables  
8  
9

10 57 The biomarkers relevant to this study were part of the routinely applied diagnostic procedures in the ED.  
11  
12 58 To classify the lab results as positive or negative, the following cut offs were used.

13  
14 59 For CRP a cut-off > 5 mg/l was used. This cut off is an established reference value [16, 17] and was used  
15  
16 60 for both sexes, as studies showed a similar distribution of this marker among men and women [18].  
17  
18

19 61 A value of hs-TnT > 14 ng/L (i.e. exceeding the 99<sup>th</sup> percentile of a multicenter reference study) [19]  
20  
21 62 describes the cut-off for both sexes. Increased levels showed a higher risk for cardiovascular events [19] and the  
22  
23 63 prognostic value of including gender difference for hs-TnT was detected only modest in other studies [20].  
24  
25

26 64 Due to the fact that mild anemia was defined as a hemoglobin (Hb) concentration between 10,0 g/dl and  
27  
28 65 11,9 g/dl in women and between 10,0 g/dl and 12,9 g/dl in men [21], we used a cut-off of < 12 g/dl for women  
29  
30 66 and < 13 g/dl for men. This identifies anemia as defined by the World Health Organization [22].  
31  
32

33 67 To assess the effect of multiple biomarkers of interest being positive in a given patient, a combined  
34  
35 68 predictor variable ranging from 0-3 was created, with zero indicating a positive result in none of the biomarkers,  
36  
37 69 1 indicating a positive result in either one of them, et cetera. This strategy of combining the predictors was chosen  
38  
39 70 as the sample size is relatively small and the pathways of the biomarker effects are assumed to be different. Also,  
40  
41 71 the resulting groups were fairly balanced.  
42

43 72 Overall comorbidity and age of the patients as a central control variable was accounted for using the  
44  
45 73 Charlson-Age Comorbidity Index (CACI) [23] based on the patient's medical history which included the  
46  
47 74 diagnoses assigned by the ED physician. These diagnoses, which are important confounding factors, were  
48  
49 75 extracted from the discharge letter after treatment in the chest pain unit, therefore including the diagnosed acute  
50  
51 76 issue for which the patient presented. Higher values of the CACI indicate more severe comorbidity.  
52

53 77 In order to more precisely account for patient's renal functioning as possible confounder, an estimate of  
54  
55 78 the creatinine clearance based on the formula by Cockcroft & Gault [24] was calculated based on serum creatinine.  
56  
57  
58  
59  
60



11

1  
2  
3  
4 79 For the purpose of sample description, participants' result (error score) on the cognitive screening  
5  
6 80 SPMSQ is also reported. The theoretical range of the SPMSQ is 0-10 and higher values indicate worse cognitive  
7  
8 81 performance.

10  
11 82 The primary outcome examined in this study was the patient's all-cause mortality (time-to-event, days)  
12  
13 83 after their initial ED visit. This information was collected using registry office information.

#### 15 84 Statistical methods

17  
18 85 To describe the characteristics of the sample, means, standard deviations, medians and interquartile  
19  
20 86 ranges were calculated for continuous or discrete variables. Absolute and relative frequencies were calculated for  
21  
22 87 categorical variables.

23  
24  
25 88 Kaplan-Meier curves were used to illustrate the associated effect of positive hs-TnT, CRP, anemia (Hb),  
26  
27 89 as well as the composite predictor of all three on overall survival after the initial ED visit. Cox proportional hazards  
28  
29 90 models were then used to first, get uncontrolled hazard ratio estimates for those effects and second, to control  
30  
31 91 those effects for patient's body-mass index, age, creatinine clearance, sex and overall comorbidity. Schoenfeld  
32  
33 92 residuals did not show evidence against the proportional hazards assumption.

34  
35 93 Missing values were rare (max.1.5% or 4/260 per variable) and were therefore handled by listwise  
36  
37 94 deletion, which reduced the total sample to  $N=256$  patients.

38  
39  
40 95 Uncertainty was quantified using 95% confidence intervals and as this study is of exploratory nature,  
41  
42 96 provided p-values are to be interpreted as descriptive.

43  
44  
45 97 All analyses were conducted using R version 3.6.1 (R Core Team, Vienna, Austria).

#### 47 98 Results

48  
49  
50 99 About 343 patients were eligible, 260 were recruited (participation rate  $\approx 76\%$ ); 4 patients had missing  
51  
52 100 data for major baseline variables due to them leaving the ED against medical advice.

53  
54  
55 101 In total, the final cohort of  $N=256$  participants can be described as a high age but, as measures of  
56  
57 102 dispersion for example for variables such as the number of medications indicate, heterogenous sample (detailed  
58  
59 103 descriptive characteristics in Table 1). Bivariate correlations show that there was only a weak association between  
60

12

1  
2  
3  
4 104 the results in each of the three biomarkers (hs-TnT with CRP:  $r_{\phi} = .30$ , 95% CI= .19-.41; hs-TnT with Hb:  $r_{\phi} =$   
5  
6 105 .35, 95% CI= .24-.45; and CRP with Hb:  $r_{\phi} = .24$ , 95% CI= .13-.36, respectively).  
7  
8  
9  
10  
11  
12  
13  
14  
15  
16  
17  
18  
19  
20  
21  
22  
23  
24  
25  
26  
27  
28  
29  
30  
31  
32  
33  
34  
35  
36  
37  
38  
39  
40  
41  
42  
43  
44  
45  
46  
47  
48  
49  
50  
51  
52  
53  
54  
55  
56  
57  
58  
59  
60

For peer review only

**Table 1***Descriptive statistics of the cohort (N=256).*

| Variable                      | n (%)     | Mean (SD)    | Median (IQR)         |
|-------------------------------|-----------|--------------|----------------------|
| Age                           |           | 79.27 (6.0)  | 79.00 (75, 83)       |
| Sex                           |           |              |                      |
| female                        | 97 (38%)  |              |                      |
| male                          | 159 (62%) |              |                      |
| School years                  |           |              |                      |
| < 9 years                     | 116 (45%) |              |                      |
| ≥ 9 years                     | 140 (55%) |              |                      |
| Falls in the past 12 months   |           |              |                      |
| At least one                  | 80 (31%)  |              |                      |
| None                          | 176 (69%) |              |                      |
| Smoker                        |           |              |                      |
| Current/former                | 104 (41%) |              |                      |
| Never                         | 152 (59%) |              |                      |
| Diabetes                      |           |              |                      |
| Yes                           | 73 (29%)  |              |                      |
| No                            | 183 (71%) |              |                      |
| Malignancy in Anamnesis       |           |              |                      |
| Active                        | 21 (8%)   |              |                      |
| Inactive                      | 19 (7%)   |              |                      |
| None                          | 216 (84%) |              |                      |
| BMI                           |           | 26.85 (4.8)  | 26.37 (23.74, 29.76) |
| SPMSQ                         |           | 1.50 (1.6)   | 1 (0, 2)             |
| No. medications               |           | 7.64 (3.8)   | 7 (5, 9.75)          |
| CACI                          |           | 5.72 (2.0)   | 5 (4, 7)             |
| Creatinine clearance (ml/min) |           | 60.42 (24.8) | 60.26 (42.25, 76.69) |
| Increased Troponine-T         | 166 (65%) |              |                      |
| Increased CRP                 | 115 (45%) |              |                      |
| Decreased Hemoglobin          | 102 (40%) |              |                      |

Note: BMI= body mass index; SPMSQ= Short Portable Mental Status Questionnaire (number of errors); CACI= Charlson Age Comorbidity Index. Creatinine clearance as calculated by Cockcroft & Gault formula.

14

1  
2  
3  
4 106 The median follow-up time calculated by reverse Kaplan-Meier method was 835 days. 63 patients (25%  
5  
6 107 of the sample) died during the follow-up period. Separate controlled and uncontrolled estimates of the association  
7  
8 108 between each biomarker and all-cause mortality are presented in Table 2, associated Kaplan-Meier curves can be  
9  
10 109 found in Supplementary Figure 1. As can be taken from Table 2 and Supplementary Figure 1, positive results in  
11  
12 110 each of the three biomarkers were associated with increased all-cause mortality at follow-up. Hemoglobin showed  
13  
14 111 the weakest association to mortality and did not remain statistically significant when adjusted for confounders.

**Table 2**

16  
17  
18 *Uncontrolled and controlled associations (hazard-ratio) of biological aging related biomarkers and mortality*  
19 *from separate Cox-regression models (N=256).*

| Variable              | Crude HR | 95% CI        | Adjusted HR | 95% CI        |
|-----------------------|----------|---------------|-------------|---------------|
| Increased Troponine-T | 7.28     | [2.92, 18.16] | 4.41        | [1.71, 11.43] |
| Increased CRP         | 3.67     | [2.12, 6.34]  | 2.97        | [1.69, 5.23]  |
| Decreased Hemoglobin  | 2.64     | [1.60, 4.38]  | 1.55        | [0.89, 2.68]  |

20  
21  
22  
23  
24  
25  
26 *Note:* HR= Hazard Ratio; adjusted estimates are controlled for sex, BMI, creatinine clearance, age and  
27 comorbidity (CACI-score).  
28  
29  
30  
31

32 112 When all three biomarkers were combined in a joint model and therefore controlled for each other  
33  
34 113 (details in Supplementary Table 3), they were still all associated with mortality at follow-up.

35  
36 114 In the main analyses, a summary score was used to predict mortality indicating how many of the three  
37  
38 115 biomarkers showed positive results in a patient (theoretical range: no positive result – three positive results).  
39  
40 116 Kaplan-Meier curves for this grouping are presented in Figure 1. Kaplan-Meier curve with 95% confidence  
41  
42 117 interval for the entire cohort is illustrated in Figure 2. The number of positive biomarkers appeared to be strongly  
43  
44 118 associated to the patient's all-cause mortality. Even when controlled for sex, BMI, creatinine clearance,  
45  
46 119 comorbidity and age as scored by the CACI, the summary score of positive biomarkers was still associated with  
47  
48 120 mortality (see Table 3). While the point-estimates for the effect sizes were notably high, this estimation comes  
49  
50 121 with considerable uncertainty as indicated by the wide 95% confidence intervals (e.g., for the patients with three  
51  
52 122 positive biomarkers vs. the no positive biomarkers reference  $HR=7.46$  and  $95\% CI= 2.12-26.28$ ).

**Table 3**

Summary of cox-regression model using the composite predictor (number of positive biomarkers, theoretical range 0-3, N=256).

| Variable                   | Hazard-Ratio | 95% CI        |
|----------------------------|--------------|---------------|
| <i>Biomarker Composite</i> |              |               |
| None (n=60)                | <i>Ref.</i>  | <i>Ref.</i>   |
| One (n=63)                 | 1.54         | [0.39, 6.04]  |
| Two (n=79)                 | 4.29         | [1.25, 14.75] |
| Three (n=54)               | 7.46         | [2.12, 26.28] |
| <i>Sex</i>                 |              |               |
| Female                     | <i>Ref.</i>  | <i>Ref.</i>   |
| Male                       | 1.11         | [0.64, 1.92]  |
| BMI                        | 0.94         | [0.90, 1.00]  |
| CACI                       | 1.32         | [1.16, 1.51]  |
| Creatinine Clearance       | 1.00         | [0.98, 1.01]  |

Note: Ref. = Reference category; BMI= Body mass index; CACI= Charlson Age Comorbidity Index. Creatinine clearance estimation as calculated by Cockcroft-Gault formula. Biomarker composite describes the number of biomarkers with a positive result.

## 123 **Discussion**

124 This exploratory, prospective cohort study examined the association of the three biomarkers CRP, hs-  
 125 TnT and Hb with mortality in order to improve older patient's risk stratification in the ED. The main results of  
 126 this study can be summarized as follows: First, each marker alone was associated with an increased risk of all-  
 127 cause mortality during a more than 2-year follow-up. Second, these biomarkers were to a certain degree  
 128 independently associated to patient's all-cause mortality. Third, the number of positive results on age-related  
 129 biomarkers was strongly indicative of the risk of patient's all-cause mortality.

130 As geriatric patients in the ED represent a complex clientele [2], the quick identification of those with  
 131 high-risk of adverse outcomes constitutes a considerable challenge. There are few studies which have examined  
 132 risk stratification of ED patients using a biological aging markers framework, especially from a dedicated geriatric  
 133 perspective. As Bahrmann et al. [25] similar to Wagner et al. [3] argue on the issue of this approach, combining  
 134 such biomarkers reflecting different pathophysiological pathways might be better than those which have the same  
 135 general mechanism [26]. Therefore, and based on theoretical considerations such as *inflammaging* and existent

1  
2  
3  
4 136 previous research tying CRP, hs-TnT, and Hb to biological aging processes across different pathways, we aimed  
5  
6 137 to provide a joint examination of those biomarkers in terms of their predictive validity regarding the mortality of  
7  
8 138 a heterogeneous sample of older ED patients, including both, frail and well performing older adults.  
9

10  
11 139 As we found in our study CRP, hs-TnT and Hb were individually all associated with older ED patient's  
12  
13 140 all-cause mortality, CRP and hs-TnT even when controlled for major confounders such as comorbidity, age,  
14  
15 141 creatinine clearance, sex, and BMI. Our study therefore largely conforms with previous research, which illustrated  
16  
17 142 an association for each marker to mortality.  
18

19 143 For instance, Bahrman et al. showed that older patients presenting to the ED with hs-TnT levels of 108  
20  
21 144 ng/L or higher had a continuous increased risk of cardiovascular death [27]. It should be considered that elevated  
22  
23 145 serum troponin concentrations can be caused by any type of heart muscle cell injury, affected by a multitude of  
24  
25 146 factors. Aside from myocardial infarction reasons for an increase can be due to other cardiac as well as non-  
26  
27 147 cardiac diseases, such as for example myocarditis, arrhythmias, sepsis, renal failure, severe acute neurological  
28  
29 148 diseases and critical illness [28]. A recent study by Zelis et al. also estimated the predictive value of several  
30  
31 149 biomarkers, including hs-TnT, for adverse outcomes in older ED patients. In line with our results, hs-TnT showed  
32  
33 150 one of the strongest associations to mortality [29].  
34

35 151 CRP as an inflammatory marker was shown to be an independent predictor of overall, cardiovascular and  
36  
37 152 inhospital mortality, as studies by Zimmermann et al. [5] as well as by Yoshinaga et al. have indicated [30]. These  
38  
39 153 findings support the theory of *inflammaging*. The aging process leads to a paradoxically hyper-activated but at the  
40  
41 154 same time defective immune system. Depending on which of these dominates, inflammatory markers could help  
42  
43 155 to distinguish between healthy aging and age-associated pathologies or the occurrence of comorbidities [31].  
44

45  
46 156 Moreover, Han et al. recently examined apparently healthy older men and could show the association of  
47  
48 157 decreased levels of Hb with overall and cancer-related mortality [13]. Other studies have also linked lowered Hb  
49  
50 158 to mortality [12, 32].  
51

52  
53 159 In our study, we were able to show that positive results on the presumably independent biomarkers CRP,  
54  
55 160 hs-TnT, and Hb were indicative of the older ED patient's risk of all-cause mortality during the follow-up period,  
56  
57 161 even when their effects were controlled for each other. This is in line with the assumption that they exert effects  
58  
59 162 at least in part across their own respective pathways [5, 13, 33]. We could also show that a strong association of  
60  
163 the number of positive biomarkers to mortality existed, even when major confounders were controlled for. These

1  
2  
3  
4 164 results support the idea that risk stratification may especially benefit from the incorporation of a multitude of  
5  
6 165 biological age-related markers that exert their effects over different physiological pathways [26]. Our exploratory  
7  
8 166 approach to examine the association of the number of positive results to mortality implies equal weighting of each  
9  
10 167 positive result. However, effect sizes for the separate biomarkers indicate that the relationship might be stronger  
11  
12 168 for selected markers (in our case, hs-TnT). This should be considered in future work, which may build on large  
13  
14 169 multicenter datasets that would resolve the issue of the high uncertainty associated with the estimates and provide  
15  
16 170 the opportunity for construction of clinical risk-scores involving these biomarkers.

17  
18  
19 171 In this context, it should be considered that this study has an exploratory, hypothesis-generating character.  
20  
21 172 Wagner et al. noted there are many theories trying to explain the aging process but as of yet it is not fully  
22  
23 173 understood [3], though the three biomarkers focused on this study are assumed to be strong candidates for an  
24  
25 174 involvement. However, their elevation or decrease could also be caused by underlying diseases such as of the  
26  
27 175 cardiovascular, oncological, or infectious type. As has been noted previously, despite many efforts it remains  
28  
29 176 difficult to identify “pure” biomarkers of aging due to their overlap with disease markers [34]. Hence, it is  
30  
31 177 important to rule out such underlying diseases by using further diagnostic tools. For this purpose, it would be  
32  
33 178 meaningful to expand on the results of this research by examining the biomarkers in a large cohort where precise  
34  
35 179 health data are available. This health data should be based on a comprehensive health assessment, and include  
36  
37 180 several indicators for latent diseases which may not have yet manifested in a diagnosis [35].

38  
39 181 Practically one could argue that in case of conspicuous values of the biomarkers an increased risk can be  
40  
41 182 assumed and further diagnostic tools are needed. Therefore, the biomarkers can serve as a good adjunct in risk-  
42  
43 183 stratification but they cannot replace further diagnostic measures. As Madhavan et al. stated, a biomarker elevation  
44  
45 184 should be considered in clinical context rather than in isolation [36]. Still, as numerous studies showed  
46  
47 185 conspicuous values of the used biomarkers reflect an increased risk of adverse outcomes in line with our results  
48  
49 186 [4, 13, 25], one could argue that regardless of whether the elevations are caused by underlying diseases or by the  
50  
51 187 aging process, they should be taken into account.

52  
53 188 Previous approaches to risk-stratification of older patients in the ED frequently employed questionnaire-  
54  
55 189 based methods (e.g. Identification of Seniors at Risk [37]). Although there is quite a body of research on these  
56  
57 190 approaches, they were found to be limited in their predictive validity [38, 39]. In comparison, the biological age-  
58  
59 191 related biomarkers showed relatively solid associations to the patient’s all-cause mortality in this and numerous  
60

1  
2  
3  
4 192 other studies [7, 13, 30]. Concerning this matter, the cohort presented in this study was previously examined with  
5  
6 193 regards to the usefulness of a cognitive screening method for the patient's risk stratification. Even when the time-  
7  
8 194 frame of the current study was restrained to 1-year after initial ED visit, we found the association for biomarkers  
9  
10 195 of aging to mortality to be considerably stronger than the association of the cognitive measure to mortality [40].  
11

12  
13 196 Thus, incorporation of biomarkers into the risk stratification of older patients in the ED appears to be a  
14  
15 197 convenient, feasible and low-cost approach, as blood collection is already implemented into the diagnostic  
16  
17 198 routines. In general, the assessment of biomarkers of age can also be considered a much more objective approach  
18  
19 199 than (self-) report-based measures.  
20

## 21 200 **Limitations**

22  
23  
24 201 Several limitations of this study must be taken into account. Due to the study being a prospective cohort  
25  
26 202 study with exploratory character, we refrain from causal inferences. While a cohort of older ED patients is difficult  
27  
28 203 to recruit, and the follow-up time in this study was considerably long, this cohort only constitutes a relatively  
29  
30 204 small sample. This rather small sample size, and consequently the low number of overall events, prevented us  
31  
32 205 from examining in more detail the specific interactions of the separate biomarkers. The small number of events  
33  
34 206 also causes the effects found in this study to come with considerable uncertainty, as indicated by the wide  
35  
36 207 confidence intervals. For this reason, weighting approaches required to construct clinical risk scores for  
37  
38 208 application in clinical practice were not feasible. In this context, one could argue that this study has due to the low  
39  
40 209 number of cases more of a pilot character. Also, strong conclusions about whether the values of these biomarkers  
41  
42 210 definitely reflect the biological aging process or whether the effects are attributable to underlying diseases is not  
43  
44 211 possible, though we made a strong effort to control for possible confounders available in our data. The recruitment  
45  
46 212 of the study sample was also limited to one specific CPU and is therefore as a convenience sample not  
47  
48 213 representative of the more heterogeneous patient populations present in the hospital. The CPU ward relates,  
49  
50 214 amongst other things, to several specific health problems, associated treatment approaches and reasons of hospital  
51  
52 215 confinement. The preconditioned informed consent procedure also constitutes a selection effect. Finally, while  
53  
54 216 we did not use age-specific cut-offs for hs-TnT as their use is discouraged for convenience in the guideline of the  
55  
56 217 European Society of Cardiology (ESC)[41], age-related variation of 99<sup>th</sup> percentile values might provide useful  
57  
58 218 information in risk-stratification processes and should be examined in further research.  
59

60 219



1  
2  
3  
4 220 **Conclusions**  
5

6  
7 221 As the results in this study show, biomarkers with an explicit relation to biological aging processes such  
8  
9 222 as CRP, hs-TnT and Hb were strongly associated to older ED patient's all-cause mortality. Therefore, they should  
10  
11 223 be considered as potential candidates to supplement or replace risk stratification approaches based on e.g.,  
12  
13 224 questionnaires, especially since, unlike questionnaire related methods, some of these biomarkers are already  
14  
15 225 implemented into the routine diagnostic process within the ED. Given their other properties such as a clear clinical  
16  
17 226 interpretation and objectivity, they could become part of low-cost, feasible risk-stratification methods. Future  
18  
19 227 research should address the validation of risk stratification approaches based on biological aging biomarkers in  
20  
21 228 large, multicenter, and across the clinical characteristic diverse samples, which would also allow for a deeper  
22  
23 229 examination of the interactions of the different aging-related biomarkers than it was possible in this small study  
24  
25 230 with pilot character.  
26  
27  
28  
29  
30  
31  
32  
33  
34  
35  
36  
37  
38  
39  
40  
41  
42  
43  
44  
45  
46  
47  
48  
49  
50  
51  
52  
53  
54  
55  
56  
57  
58  
59  
60

## 231 REFERENCES

- 232 1 Aminzadeh F DWB. Older adults in the emergency department: A systematic review of patterns  
233 of use, adverse outcomes, and effectiveness of interventions 2002 Accessed November 02,  
234 2019.
- 235 2 Salvi F, Morichi V, Grilli A, et al. The elderly in the emergency department: a critical review of  
236 problems and solutions. *Intern Emerg Med* 2007;2(4):292–301. doi:10.1007/s11739-007-0081-  
237 3 [published Online First: 28 November 2007].
- 238 3 Wagner K-H, Cameron-Smith D, Wessner B, et al. Biomarkers of Aging: From Function to  
239 Molecular Biology. *Nutrients* 2016;8(6). doi:10.3390/nu8060338 [published Online First: 2 June  
240 2016].
- 241 4 De Martinis, M. et al. Inflammation markers predicting frailty and mortality in the elderly.  
242 *Experimental and Molecular Pathology* 2006;80(3):219–27. doi:10.1016/j.yexmp.2005.11.004  
243 [published Online First: Juni 2006].
- 244 5 Zimmermann, J., Herrlinger, S., Pruy, A., Metzger, T., & Wanner, C. Inflammation enhances  
245 cardiovascular risk and mortality in hemodialysis patients 1999. Available at:  
246 <https://www.sciencedirect.com/science/article/pii/S0085253815460090> Accessed October 13,  
247 2019.
- 248 6 Ridker, M P, Cushman, et al. Inflammation, Aspirin, and the Risk of Cardiovascular Disease in  
249 Apparently Healthy Men | NEJM 2009. Available at:  
250 <https://www.nejm.org/doi/full/10.1056/nejm199704033361401> Accessed October 13, 2019.
- 251 7 Meigher S, Thode HC, Peacock WF, et al. Causes of Elevated Cardiac Troponins in the  
252 Emergency Department and Their Associated Mortality. *Acad Emerg Med* 2016;23(11):1267–  
253 73. doi:10.1111/acem.13033 [published Online First: 20 June 2016].
- 254 8 Bardaji, A., Cediél, G., Carrasquer, A., de Castro, R., Sánchez, R., & Boqué, C. Troponin Elevation  
255 in Patients Without Acute Coronary Syndrome 2015. Available at:  
256 <https://www.sciencedirect.com/science/article/pii/S188558571500033X> Accessed October 13,  
257 2019.
- 258 9 Groot B de, Verdoorn RCW, Lameijer J, et al. High-sensitivity cardiac troponin T is an  
259 independent predictor of inhospital mortality in emergency department patients with  
260 suspected infection: a prospective observational derivation study. *Emerg Med J*  
261 2014;31(11):882–88. doi:10.1136/emered-2013-202865 [published Online First: 21 August  
262 2013].
- 263 10 deFilippi CR, Lemos JA de, Christenson RH, et al. Association of serial measures of cardiac  
264 troponin T using a sensitive assay with incident heart failure and cardiovascular mortality in  
265 older adults. *JAMA* 2010;304(22):2494–502. doi:10.1001/jama.2010.1708 [published Online  
266 First: 8 December 2010].
- 267 11 Kaura A, Panoulas V, Glampson B, et al. Association of troponin level and age with mortality in  
268 250 000 patients: cohort study across five UK acute care centres. *BMJ* 2019;367:l6055  
269 (accessed 28 Aug 2020).
- 270 12 Culleton BF, Manns BJ, Zhang J, et al. Impact of anemia on hospitalization and mortality in  
271 older adults. *Blood* 2006;107(10):3841–46. doi:10.1182/blood-2005-10-4308 [published Online  
272 First: 15 May 2006].

21

- 1  
2  
3  
4 273 13 Han SV, Park M, Kwon Y-M, et al. Mild Anemia and Risk for All-Cause, Cardiovascular and  
5 274 Cancer Deaths in Apparently Healthy Elderly Koreans. *Korean J Fam Med* 2019;40(3):151–58.  
6 275 doi:10.4082/kjfm.17.0089 [published Online First: 17 January 2019].  
7  
8 276 14 den Elzen WPJ, Willems JM, Westendorp RGJ, et al. Effect of anemia and comorbidity on  
9 277 functional status and mortality in old age: results from the Leiden 85-plus Study. *CMAJ*  
10 278 2009;181(3-4):151–57. doi:10.1503/cmaj.090040 [published Online First: 4 August 2009].  
11 279 15 Pfeiffer E. A short portable mental status questionnaire for the assessment of organic brain  
12 280 deficit in elderly patients. *J Am Geriatr Soc* 1975;23(10):433–41.  
13  
14 281 16 Luppá P.B. SW. Referenzwerte der wichtigsten Laborparameter 2020. Available at:  
15 282 [https://link.springer.com/chapter/10.1007/978-3-662-54507-2\\_159#citeas](https://link.springer.com/chapter/10.1007/978-3-662-54507-2_159#citeas) Accessed June 11,  
16 283 2020.  
17  
18 284 17 Morrow David A, Rifai Nader, Antman Elliott M, et al. C-Reactive Protein Is a Potent Predictor  
19 285 of Mortality Independently of and in Combination With Troponin T in Acute Coronary  
20 286 Syndromes: A TIMI 11A Substudy. *J Am Coll Cardiol* 1998;31(7):1460–65 (accessed 27 May  
21 287 2021).  
22  
23 288 18 Rifai N, Ridker PM. Population distributions of C-reactive protein in apparently healthy men  
24 289 and women in the United States: implication for clinical interpretation. *Clin Chem*  
25 290 2003;49(4):666–69 (accessed 13 Jun 2020).  
26  
27 291 19 Giannitsis E, Kurz K, Hallermayer K, et al. Analytical validation of a high-sensitivity cardiac  
28 292 troponin T assay. *Clin Chem* 2010;56(2):254–61 (accessed 11 Jun 2020).  
29  
30 293 20 Mueller-Hennessen M, Lindahl B, Giannitsis E, et al. Diagnostic and prognostic implications  
31 294 using age- and gender-specific cut-offs for high-sensitivity cardiac troponin T - Sub-analysis  
32 295 from the TRAPID-AMI study. *Int J Cardiol* 2016;209:26–33 (accessed 11 Jun 2020).  
33  
34 296 21 Riva E, Tettamanti M, Mosconi P, et al. Association of mild anemia with hospitalization and  
35 297 mortality in the elderly: the Health and Anemia population-based study. *Haematologica*  
36 298 2009;94(1):22–28 (accessed 11 Jun 2020).  
37  
38 299 22 Weltgesundheitsorganisation. Research into environmental pollution: Report of five WHO  
39 300 scientific groups. Geneva: World Health Organization 1968.  
40  
41 301 23 Charlson M, Szatrowski TP, Peterson J, et al. Validation of a combined comorbidity index.  
42 302 *Journal of Clinical Epidemiology* 1994;47(11):1245–51 (accessed 11 Jun 2020).  
43  
44 303 24 Cockcroft DW, Gault MH. Prediction of creatinine clearance from serum creatinine. *Nephron*  
45 304 1976;16(1):31–41 (accessed 30 Aug 2020).  
46  
47 305 25 Bahrman P, Bahrman A, Hofner B, et al. Multiple biomarker strategy for improved diagnosis  
48 306 of acute heart failure in older patients presenting to the emergency department. *European*  
49 307 *Heart Journal: Acute Cardiovascular Care* 2015;4(2):137–47 (accessed 8 Aug 2020).  
50  
51 308 26 Manzano L, Escobar C, Cleland JGF, et al. Diagnosis of elderly patients with heart failure. *Eur J*  
52 309 *Heart Fail* 2012;14(10):1097–103 (accessed 10 Aug 2020).  
53  
54 310 27 Bahrman P, Christ M, Bahrman A, et al. A 3-hour diagnostic algorithm for non-ST-elevation  
55 311 myocardial infarction using high-sensitivity cardiac troponin T in unselected older patients  
56 312 presenting to the emergency department. *J Am Med Dir Assoc* 2013;14(6):409–16 (accessed 7  
57 313 Aug 2020).  
58  
59 314 28 Suzuki K, Komukai K, Nakata K, et al. The Usefulness and Limitations of Point-of-care Cardiac  
60 315 Troponin Measurement in the Emergency Department. *Intern Med* 2018;57(12):1673–80  
316 (accessed 28 Aug 2020).

22

- 1  
2  
3  
4 317 29 Zelis N, Hundscheid R, Buijs J, et al. Value of biomarkers in predicting mortality in older medical  
5 318 emergency department patients: a Dutch prospective study. *BMJ Open* 2021;11(1):e042989.  
6 319 doi:10.1136/bmjopen-2020-042989 [published Online First: 31 January 2021].  
7 320 30 Yoshinaga R, Doi Y, Ayukawa K, et al. High-sensitivity C reactive protein as a predictor of  
8 321 inhospital mortality in patients with cardiovascular disease at an emergency department: a  
9 322 retrospective cohort study. *BMJ Open* 2017;7(10):e015112.  
10 323 <https://bmjopen.bmj.com/content/7/10/e015112.citation-tools>.  
11 324 31 Larbi A, Franceschi C, Mazzatti D, et al. Aging of the immune system as a prognostic factor for  
12 325 human longevity. *Physiology (Bethesda)* 2008;23:64–74 (accessed 27 May 2021).  
13 326 32 Zakai NA, Katz R, Hirsch C, et al. A prospective study of anemia status, hemoglobin  
14 327 concentration, and mortality in an elderly cohort: the Cardiovascular Health Study. *Arch Intern*  
15 328 *Med* 2005;165(19):2214–20.  
16 329 33 Bahrmann P, Bahrmann A, Breithardt O-A, et al. Additional diagnostic and prognostic value of  
17 330 copeptin ultra-sensitive for diagnosis of non-ST-elevation myocardial infarction in older  
18 331 patients presenting to the emergency department. *Clin Chem Lab Med* 2013;51(6):1307–19  
19 332 (accessed 7 Aug 2020).  
20 333 34 American Federation for Aging Research. Biomarkers of Aging 2016. Available at:  
21 334 [https://www.afar.org/imported/AFAR\\_BIOMARKERS\\_OF\\_AGING\\_2016.pdf](https://www.afar.org/imported/AFAR_BIOMARKERS_OF_AGING_2016.pdf).  
22 335 35 Häselser-Ouart K, Arefian H, Hartmann M, et al. Geriatric assessment for older adults admitted  
23 336 to the emergency department: A systematic review and meta-analysis. *Experimental*  
24 337 *Gerontology* 2021;144:111184. doi:10.1016/j.exger.2020.111184 [published Online First: 3  
25 338 December 2020].  
26 339 36 Madhavan MV, Gersh BJ, Alexander KP, et al. Coronary Artery Disease in Patients ≥80 Years of  
27 340 Age. *J Am Coll Cardiol* 2018;71(18):2015–40.  
28 341 37 McCusker J, Bellavance F, Cardin S, et al. Detection of older people at increased risk of adverse  
29 342 health outcomes after an emergency visit: the ISAR screening tool. *J Am Geriatr Soc*  
30 343 1999;47(10):1229–37.  
31 344 38 Galvin R, Gillett Y, Wallace E, et al. Adverse outcomes in older adults attending emergency  
32 345 departments: a systematic review and meta-analysis of the Identification of Seniors At Risk  
33 346 (ISAR) screening tool. *Age Ageing* 2017;46(2):179–86. doi:10.1093/ageing/afw233 [published  
34 347 Online First: 15 December 2016].  
35 348 39 Carpenter CR, Shelton E, Fowler S, et al. Risk factors and screening instruments to predict  
36 349 adverse outcomes for undifferentiated older emergency department patients: a systematic  
37 350 review and meta-analysis. *Acad Emerg Med* 2015;22(1):1–21. doi:10.1111/acem.12569  
38 351 [published Online First: 6 January 2015].  
39 352 40 Schönstein A, Wahl H-W, Katus HA, et al. SPMSQ zur Risikostratifizierung älterer Patienten in  
40 353 der Notaufnahme Eine explorative prospektive Kohortenstudie. *Z Gerontol Geriatr*  
41 354 2019;52(Suppl 4):222–28 (accessed 10 Aug 2020).  
42 355 41 Collet J-P, Thiele H, Barbato E, et al. 2020 ESC Guidelines for the management of acute  
43 356 coronary syndromes in patients presenting without persistent ST-segment elevation. *Eur Heart*  
44 357 *J* 2020. doi:10.1093/eurheartj/ehaa575 [published Online First: 29 August 2020].  
45  
46  
47  
48  
49  
50  
51  
52  
53  
54  
55  
56  
57  
58  
59  
60

**Attached Figures:***Figure 1: Kaplan-Meier curves for composite*

Kaplan-Meier curves with 95% confidence intervals for patients grouped by the number of positive aging related biomarkers (theoretical range 0-3,  $N= 256$ ).

*Figure 2: Kaplan-Meier curve for the entire cohort*

Kaplan-Meier curve with 95% confidence interval for the entire cohort.

For peer review only

1  
2  
3  
4  
5  
6  
7  
8  
9  
10  
11  
12  
13  
14  
15  
16  
17  
18  
19  
20  
21  
22  
23  
24  
25  
26  
27  
28  
29  
30  
31  
32  
33  
34  
35  
36  
37  
38  
39  
40  
41  
42  
43  
44  
45  
46  
47  
48  
49  
50  
51  
52  
53  
54  
55  
56  
57  
58  
59  
60

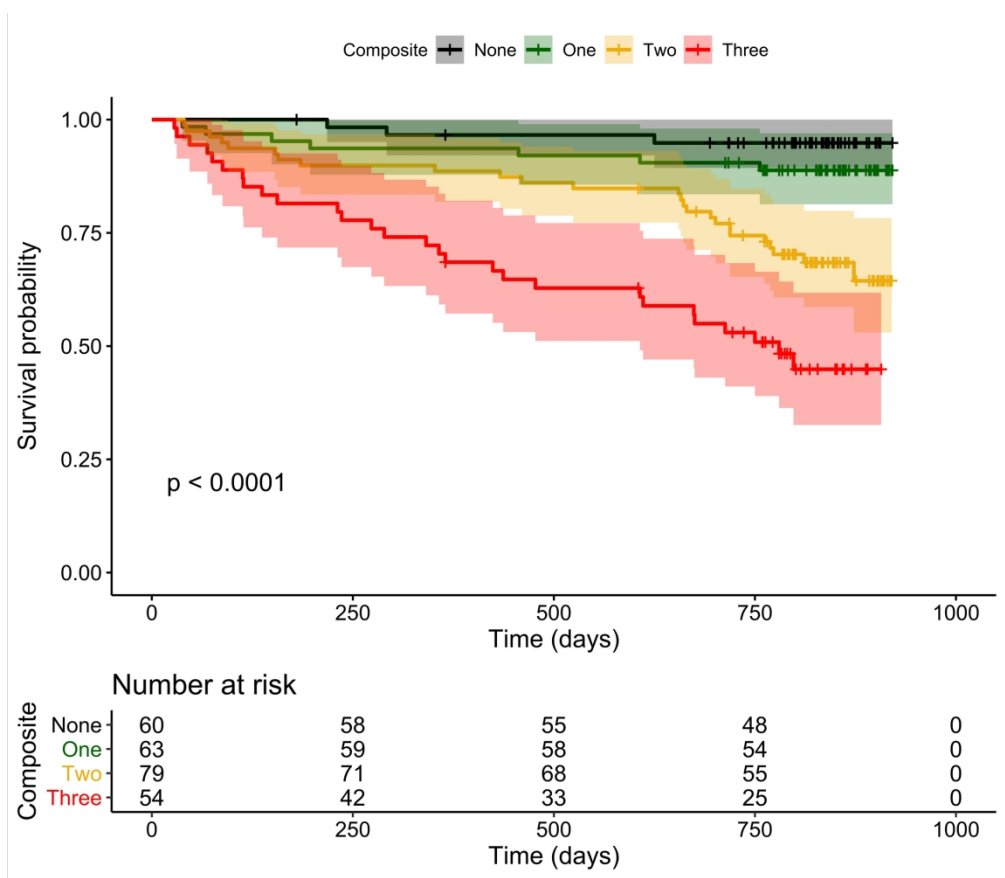

Figure 1: Kaplan-Meier curves for composite Kaplan-Meier curves with 95% confidence intervals for patients grouped by the number of positive aging related biomarkers (theoretical range 0-3, N= 256).

198x171mm (300 x 300 DPI)

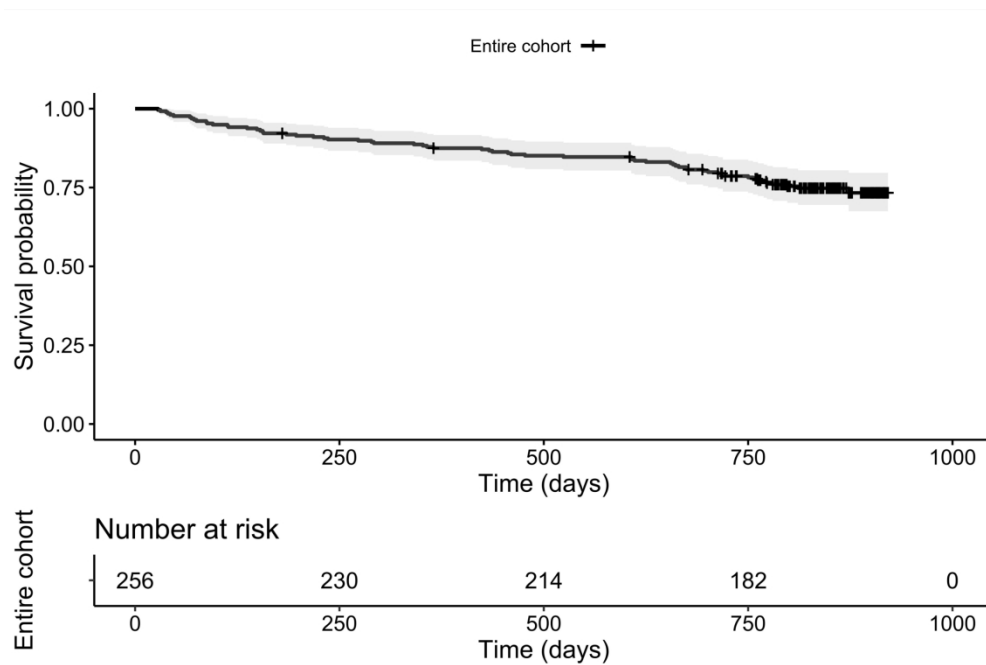

Figure 2: Kaplan-Meier curve for the entire cohort  
Kaplan-Meier curve with 95% confidence interval for the entire cohort.

198x132mm (300 x 300 DPI)

## Supplement

## Supplementary Table 1

*Primary diagnoses in the sample (N=256).*

| Primary diagnoses                                                                     | Number (%) of patients (total N=256) |
|---------------------------------------------------------------------------------------|--------------------------------------|
| <i>Group 1: Suspicion/Exclusion of myocardial infarction or Myocardial infarction</i> | 66 (26%)                             |
| <i>Group 2: Cardiac decompensation</i>                                                | 60 (23%)                             |
| <i>Group 3: Heart rhythm disturbances*</i>                                            | 48 (19%)                             |
| <i>Group 4: Hypertensive derailment</i>                                               | 17 ( 7%)                             |
| <i>Group 5: Others</i>                                                                | 65 (25%)                             |

*Note: \*(Atrial fibrillation/atrial flutter, tachyarrhythmia absoluta).*

## Supplementary Table 2

*Frequent secondary diagnoses (N=256).*

| Most common secondary diagnoses      | Number (%) of patients (total N=256) |
|--------------------------------------|--------------------------------------|
| Renal insufficiency / kidney disease | 51 (20%)                             |
| Heart failure                        | 33 (13%)                             |
| Anemia                               | 21 ( 8%)                             |
| Pneumonia                            | 30 (12%)                             |



## Supplementary Table 3

*Uncontrolled and controlled associations (hazard-ratio) of biological aging related biomarkers and mortality from Cox-Regression models including all biomarkers as predictors simultaneously (N=256).*

| Variable              | HR (Model 1) | 95% CI        | HR (Model 2) | 95% CI       |
|-----------------------|--------------|---------------|--------------|--------------|
| Increased Troponine-T | 4.84         | [1.90, 12.32] | 3.61         | [1.39, 9.40] |
| Increased CRP         | 2.57         | [1.47, 4.48]  | 2.64         | [1.50, 4.66] |
| Decreased Hemoglobin  | 1.68         | [1.00, 2.81]  | 1.20         | [0.69, 2.07] |

*Note:* HR= Hazard Ratio; Model 1: Survival predicted by the three dummy coded biomarker variables. Model 2: Survival predicted by the three dummy coded biomarker variables as well as covariates sex, BMI, creatinine clearance, age and comorbidity (CACI-score). Estimates within a column are therefore from the same model.



Supplementary Figure 1. Kaplan-Meier curves for patients grouped by A) increased Troponine-T B) increased C - reactive Protein and C) lowered Hemoglobin. Time units are days.

## STROBE 2007 (v4) Statement—Checklist of items that should be included in reports of cohort studies

| Section/Topic            | Item # | Recommendation                                                                                                                                                                       | Reported on page # |
|--------------------------|--------|--------------------------------------------------------------------------------------------------------------------------------------------------------------------------------------|--------------------|
| Title and abstract       | 1      | (a) Indicate the study's design with a commonly used term in the title or the abstract                                                                                               | 1                  |
|                          |        | (b) Provide in the abstract an informative and balanced summary of what was done and what was found                                                                                  | 3                  |
| <b>Introduction</b>      |        |                                                                                                                                                                                      | <b>7</b>           |
| Background/rationale     | 2      | Explain the scientific background and rationale for the investigation being reported                                                                                                 | 7                  |
| Objectives               | 3      | State specific objectives, including any prespecified hypotheses                                                                                                                     | 7                  |
| <b>Methods</b>           |        |                                                                                                                                                                                      | <b>8-10</b>        |
| Study design             | 4      | Present key elements of study design early in the paper                                                                                                                              | 8                  |
| Setting                  | 5      | Describe the setting, locations, and relevant dates, including periods of recruitment, exposure, follow-up, and data collection                                                      | 8                  |
| Participants             | 6      | (a) Give the eligibility criteria, and the sources and methods of selection of participants. Describe methods of follow-up                                                           | 8                  |
|                          |        | (b) For matched studies, give matching criteria and number of exposed and unexposed                                                                                                  | N/A                |
| Variables                | 7      | Clearly define all outcomes, exposures, predictors, potential confounders, and effect modifiers. Give diagnostic criteria, if applicable                                             | 8 and 9            |
| Data sources/measurement | 8*     | For each variable of interest, give sources of data and details of methods of assessment (measurement). Describe comparability of assessment methods if there is more than one group | 8 and 9            |
| Bias                     | 9      | Describe any efforts to address potential sources of bias                                                                                                                            | 9                  |
| Study size               | 10     | Explain how the study size was arrived at                                                                                                                                            | 8 and 10           |
| Quantitative variables   | 11     | Explain how quantitative variables were handled in the analyses. If applicable, describe which groupings were chosen and why                                                         | 8, 9, 10           |
| Statistical methods      | 12     | (a) Describe all statistical methods, including those used to control for confounding                                                                                                | 9, 10              |
|                          |        | (b) Describe any methods used to examine subgroups and interactions                                                                                                                  | 9                  |
|                          |        | (c) Explain how missing data were addressed                                                                                                                                          | 10                 |
|                          |        | (d) If applicable, explain how loss to follow-up was addressed                                                                                                                       | N/A                |
|                          |        | (e) Describe any sensitivity analyses                                                                                                                                                | 9, 10              |

|                          |     |                                                                                                                                                                                                              |                      |
|--------------------------|-----|--------------------------------------------------------------------------------------------------------------------------------------------------------------------------------------------------------------|----------------------|
| <b>Results</b>           |     |                                                                                                                                                                                                              | <b>9-12</b>          |
| Participants             | 13* | (a) Report numbers of individuals at each stage of study—eg numbers potentially eligible, examined for eligibility, confirmed eligible, included in the study, completing follow-up, and analysed            | 10                   |
|                          |     | (b) Give reasons for non-participation at each stage                                                                                                                                                         | 10                   |
|                          |     | (c) Consider use of a flow diagram                                                                                                                                                                           | -                    |
| Descriptive data         | 14* | (a) Give characteristics of study participants (eg demographic, clinical, social) and information on exposures and potential confounders                                                                     | 9 and 10             |
|                          |     | (b) Indicate number of participants with missing data for each variable of interest                                                                                                                          | 10, Fig. 1           |
|                          |     | (c) Summarise follow-up time (eg, average and total amount)                                                                                                                                                  | 12                   |
| Outcome data             | 15* | Report numbers of outcome events or summary measures over time                                                                                                                                               | 12                   |
| Main results             | 16  | (a) Give unadjusted estimates and, if applicable, confounder-adjusted estimates and their precision (eg, 95% confidence interval). Make clear which confounders were adjusted for and why they were included | 12, Tables & Figures |
|                          |     | (b) Report category boundaries when continuous variables were categorized                                                                                                                                    | 8, 9                 |
|                          |     | (c) If relevant, consider translating estimates of relative risk into absolute risk for a meaningful time period                                                                                             | see Fig. 1           |
| Other analyses           | 17  | Report other analyses done—eg analyses of subgroups and interactions, and sensitivity analyses                                                                                                               | -                    |
| <b>Discussion</b>        |     |                                                                                                                                                                                                              | <b>13-16</b>         |
| Key results              | 18  | Summarise key results with reference to study objectives                                                                                                                                                     | 13                   |
| <b>Limitations</b>       |     |                                                                                                                                                                                                              | <b>15-16</b>         |
| Interpretation           | 20  | Give a cautious overall interpretation of results considering objectives, limitations, multiplicity of analyses, results from similar studies, and other relevant evidence                                   | 15, 16               |
| Generalisability         | 21  | Discuss the generalisability (external validity) of the study results                                                                                                                                        | 15, 16               |
| <b>Other information</b> |     |                                                                                                                                                                                                              |                      |
| Funding                  | 22  | Give the source of funding and the role of the funders for the present study and, if applicable, for the original study on which the present article is based                                                | 3                    |
