# Supplementary material for: Exploring biomarkers in routine diagnostics for the risk stratification of older patients in the Chest Pain Unit: a prospective cohort study
Source: PubMed Central journal article supplement — BMJ Open. 2022 Dec 26;12(12):e056674. doi: 10.1136/bmjopen-2021-056674 (PMC9806057; doi:10.1136/bmjopen-2021-056674), 2022-12-26
Supplement: bmjopen-2021-056674supp001.pdf [file bmjopen-2021-056674supp001.pdf]

## Supplement

## Supplementary Table 1

*Primary diagnoses in the sample (N=256).*

| Primary diagnoses                                                                     | Number (%) of patients (total N=256) |
|---------------------------------------------------------------------------------------|--------------------------------------|
| <i>Group 1: Suspicion/Exclusion of myocardial infarction or Myocardial infarction</i> | 66 (26%)                             |
| <i>Group 2: Cardiac decompensation</i>                                                | 60 (23%)                             |
| <i>Group 3: Heart rhythm disturbances*</i>                                            | 48 (19%)                             |
| <i>Group 4: Hypertensive derailment</i>                                               | 17 ( 7%)                             |
| <i>Group 5: Others</i>                                                                | 65 (25%)                             |

*Note: \*(Atrial fibrillation/atrial flutter, tachyarrhythmia absoluta).*

## Supplementary Table 2

*Frequent secondary diagnoses (N=256).*

| Most common secondary diagnoses      | Number (%) of patients (total N=256) |
|--------------------------------------|--------------------------------------|
| Renal insufficiency / kidney disease | 51 (20%)                             |
| Heart failure                        | 33 (13%)                             |
| Anemia                               | 21 ( 8%)                             |
| Pneumonia                            | 30 (12%)                             |

## Supplementary Table 3

*Uncontrolled and controlled associations (hazard-ratio) of biological aging related biomarkers and mortality from Cox-Regression models including all biomarkers as predictors simultaneously (N=256).*

| Variable              | HR (Model 1) | 95% CI        | HR (Model 2) | 95% CI       |
|-----------------------|--------------|---------------|--------------|--------------|
| Increased Troponine-T | 4.84         | [1.90, 12.32] | 3.61         | [1.39, 9.40] |
| Increased CRP         | 2.57         | [1.47, 4.48]  | 2.64         | [1.50, 4.66] |
| Decreased Hemoglobin  | 1.68         | [1.00, 2.81]  | 1.20         | [0.69, 2.07] |

*Note:* HR= Hazard Ratio; Model 1: Survival predicted by the three dummy coded biomarker variables. Model 2: Survival predicted by the three dummy coded biomarker variables as well as covariates sex, BMI, creatinine clearance, age and comorbidity (CACI-score). Estimates within a column are therefore from the same model.

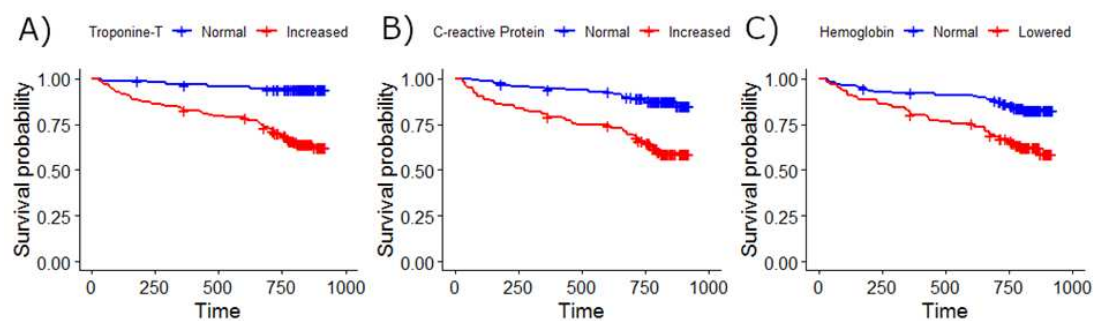

Supplementary Figure 1. Kaplan-Meier curves for patients grouped by A) increased Troponine-T B) increased C - reactive Protein and C) lowered Hemoglobin. Time units are days.
